# Supplementary material for: Effects of Poncirin, a Citrus Flavonoid and Its Aglycone, Isosakuranetin, on the Gut Microbial Diversity and Metabolomics in Mice
Source: MDPI journal article supplement (doi:10.3390/molecules27113641), 2022-06-06
Supplement: s1 [file s1]

**Supplementary Table S1** Identification of the most discriminant metabolomic variables between PC group and Control

| group    |      |                |                              |                                                                 |                                                                                                      |                                      |                          |         |  |
|----------|------|----------------|------------------------------|-----------------------------------------------------------------|------------------------------------------------------------------------------------------------------|--------------------------------------|--------------------------|---------|--|
| m/z      | Mode | Retention time | Adducts                      | Formula                                                         | Metabolite                                                                                           | Subclass                             | Fold change (PC/Control) | P value |  |
| 407.2789 | neg  | 6.412          | M-H, M+Cl, M+FA-H, 2M-H      | C <sub>24</sub> H <sub>40</sub> O <sub>5</sub>                  | Cholic acid                                                                                          | Bile acids, alcohols and derivatives | 1.177                    | 0.001   |  |
| 227.0663 | neg  | 2.628          | M-H, M+FA-H, M+Cl            | C <sub>9</sub> H <sub>12</sub> N <sub>2</sub> O <sub>5</sub>    | 2'-Deoxyuridine                                                                                      | Pyrimidine 2'-deoxyribonucleosides   | 0.899                    | 0.041   |  |
| 296.6158 | neg  | 6.172          | M-2H, M-H, M+Na-2H           | C <sub>26</sub> H <sub>45</sub> NO <sub>10</sub> S <sub>2</sub> | Taurocholic acid 3-sulfate                                                                           | Bile acids, alcohols and derivatives | 1.163                    | 0.001   |  |
| 405.2631 | neg  | 6.425          | M-H, M+Cl, 2M-H              | C <sub>24</sub> H <sub>38</sub> O <sub>5</sub>                  | 7-Ketodeoxycholic acid                                                                               | Bile acids, alcohols and derivatives | 1.181                    | 0.002   |  |
| 461.1074 | neg  | 6.152          | M-H, 2M-H, M+Na-2H           | C <sub>22</sub> H <sub>22</sub> O <sub>11</sub>                 | 6-{3,5-dihydroxy-4-[3-(4-methoxyphenyl)prop-2-enoyl]phenoxy}-3,4,5-trihydroxyoxane-2-carboxylic acid | Flavonoid glycosides                 | 1.191                    | 0.021   |  |
| 174.0395 | neg  | 1.194          | M-H <sub>2</sub> O-H, M-H    | C <sub>6</sub> H <sub>9</sub> NO <sub>5</sub>                   | N-acetylaspartate                                                                                    | Amino acids, peptides, and analogues | 0.936                    | 0.028   |  |
| 391.2843 | neg  | 6.528          | M-H, M+FA-H                  | C <sub>24</sub> H <sub>40</sub> O <sub>4</sub>                  | Deoxycholic acid                                                                                     | Bile acids, alcohols and derivatives | 1.203                    | 0.014   |  |
| 327.1074 | neg  | 6.172          | M-H <sub>2</sub> O-H, M+FA-H | C <sub>14</sub> H <sub>18</sub> O <sub>6</sub>                  | 2-[4,6-dihydroxy-3-(4-hydroxy-3-methylbut-2-en-1-yl)-2-methoxyphenyl]acetic acid                     | Phenylacetic acids                   | 0.880                    | 0.003   |  |
| 269.1247 | neg  | 2.476          | M+FA-H                       | C <sub>12</sub> H <sub>18</sub> NO <sub>3</sub> <sup>+</sup>    | (4-Hydroxybenzoyl)choline                                                                            | Benzoic acids and derivatives        | 0.952                    | 0.033   |  |

|          |     |       |                      |                                                                |                                                                                            |                                           |       |       |
|----------|-----|-------|----------------------|----------------------------------------------------------------|--------------------------------------------------------------------------------------------|-------------------------------------------|-------|-------|
| 146.0234 | neg | 2.490 | M-H <sub>2</sub> O-H | C <sub>8</sub> H <sub>7</sub> NO <sub>3</sub>                  | 4-Pyridoxolactone                                                                          | Pyridinecarboxylic acids and derivatives  | 1.074 | 0.042 |
| 282.0833 | neg | 2.717 | M-H                  | C <sub>10</sub> H <sub>13</sub> N <sub>5</sub> O <sub>5</sub>  | Guanosine                                                                                  | —                                         | 1.115 | 0.005 |
| 291.0171 | neg | 2.875 | M+FA-H               | C <sub>9</sub> H <sub>10</sub> O <sub>6</sub> S                | {[3-(2-hydroxyphenyl)oxiran-2-yl]methoxy}sulfonic acid                                     | 1-hydroxy-4-unsubstituted benzenoids      | 0.939 | 0.010 |
| 193.0607 | neg | 3.019 | M-H                  | C <sub>9</sub> H <sub>10</sub> N <sub>2</sub> O <sub>3</sub>   | Aminohippuric acid                                                                         | Benzoic acids and derivatives             | 1.055 | 0.012 |
| 391.1597 | neg | 3.455 | M+FA-H               | C <sub>16</sub> H <sub>26</sub> O <sub>8</sub>                 | (1R,3S,4S,6R)-6,9-Dihydroxyfenchone 6-O-b-D-glucoside                                      | Terpene glycosides                        | 1.101 | 0.021 |
| 467.1864 | neg | 4.232 | M-H <sub>2</sub> O-H | C <sub>18</sub> H <sub>34</sub> N <sub>2</sub> O <sub>13</sub> | Glucosylgalactosyl hydroxylysine                                                           | Fatty acyl glycosides                     | 1.051 | 0.007 |
| 395.2059 | neg | 5.077 | M+FA-H               | C <sub>20</sub> H <sub>30</sub> O <sub>5</sub>                 | Resolvin E1                                                                                | Eicosanoids                               | 1.136 | 0.010 |
| 271.0602 | neg | 5.234 | M-H                  | C <sub>15</sub> H <sub>12</sub> O <sub>5</sub>                 | (+/-)-Naringenin                                                                           | -                                         | 0.827 | 0.019 |
| 431.1907 | neg | 5.275 | M+FA-H               | C <sub>19</sub> H <sub>30</sub> O <sub>8</sub>                 | Corchoionol C 9-glucoside                                                                  | Fatty acyl glycosides                     | 1.037 | 0.025 |
| 379.211  | neg | 5.378 | M+FA-H               | C <sub>20</sub> H <sub>30</sub> O <sub>4</sub>                 | (ent-16betaOH)-16,17-Dihydroxy-9(11)-kauren-19-oic acid                                    | —                                         | 1.040 | 0.046 |
| 347.1699 | neg | 5.412 | M-H <sub>2</sub> O-H | C <sub>16</sub> H <sub>30</sub> O <sub>9</sub>                 | (1S,2S,4R,8S)-p-Menthane-1,2,8,9-tetrol 2-glucoside                                        | Terpene glycosides                        | 1.059 | 0.035 |
| 369.1177 | neg | 5.419 | M-H                  | C <sub>17</sub> H <sub>22</sub> O <sub>9</sub>                 | 6-[2,4-dihydroxy-3-(3-methylbut-2-en-1-yl)phenoxy]-3,4,5-trihydroxyoxane-2-carboxylic acid | Carbohydrates and carbohydrate conjugates | 0.835 | 0.009 |
| 345.1692 | neg | 5.515 | M-H <sub>2</sub> O-H | C <sub>20</sub> H <sub>28</sub> O <sub>6</sub>                 | Blumealactone A                                                                            | Monoterpenoids                            | 2.203 | 0.018 |
| 226.0267 | neg | 5.659 | M+Cl                 | C <sub>10</sub> H <sub>9</sub> NO <sub>3</sub>                 | 5-Phenyl-1,3-oxazinane-2,4-dione                                                           | —                                         | 1.146 | 0.030 |
| 149.0594 | neg | 5.686 | M-H                  | C <sub>9</sub> H <sub>10</sub> O <sub>2</sub>                  | 4-(prop-2-en-1-yl)benzene-1,2-diol                                                         | Benzenediols                              | 0.921 | 0.026 |
| 405.1752 | neg | 5.919 | 2M-H                 | C <sub>7</sub> H <sub>13</sub> N <sub>3</sub> O <sub>4</sub>   | Glycyl-Gamma-glutamate                                                                     | Amino acids, peptides, and analogues      | 0.957 | 0.007 |
| 231.0322 | neg | 6.138 | M-H                  | C <sub>9</sub> H <sub>12</sub> O <sub>5</sub> S                | (4-ethyl-2-methoxyphenyl)oxidanesulfonic acid                                              | Arylsulfates                              | 0.734 | 0.000 |

|          |     |       |                      |                                                   |                                                                                                  |                                      |       |       |
|----------|-----|-------|----------------------|---------------------------------------------------|--------------------------------------------------------------------------------------------------|--------------------------------------|-------|-------|
| 471.3098 | neg | 6.460 | M+FA-H               | C <sub>28</sub> H <sub>42</sub> O <sub>3</sub>    | (3beta,5alpha,6alpha,7alpha,22E,24R)-5,6-Epoxyergosta-8,14,22-triene-3,7-diol                    | Ergostane steroids                   | 1.143 | 0.010 |
| 450.2603 | neg | 6.665 | M-H                  | C <sub>21</sub> H <sub>42</sub> NO <sub>7</sub> P | LysoPE(16:1(9Z)/0:0)                                                                             | Glycerophosphoethanolamines          | 1.450 | 0.000 |
| 478.2921 | neg | 6.789 | M-H                  | C <sub>23</sub> H <sub>46</sub> NO <sub>7</sub> P | PE(18:1(9Z)/0:0)                                                                                 | -                                    | 1.430 | 0.000 |
| 509.2866 | neg | 7.648 | M+FA-H               | C <sub>23</sub> H <sub>45</sub> O <sub>7</sub> P  | 1-(11Z-eicosenoyl)-glycero-3-phosphate                                                           | Glycerophosphates                    | 1.324 | 0.000 |
| 436.2817 | neg | 6.844 | M-H                  | C <sub>21</sub> H <sub>44</sub> NO <sub>6</sub> P | PE(P-16:0e/0:0)                                                                                  | -                                    | 1.084 | 0.042 |
| 452.2767 | neg | 6.782 | M-H                  | C <sub>21</sub> H <sub>44</sub> NO <sub>7</sub> P | PE(16:0/0:0)                                                                                     | Glycerophosphoethanolamines          | 1.565 | 0.000 |
| 498.2878 | neg | 6.727 | M+FA-H               | C <sub>21</sub> H <sub>44</sub> NO <sub>7</sub> P | LysoPE(0:0/16:0)                                                                                 | Glycerophosphoethanolamines          | 1.359 | 0.005 |
| 455.3152 | neg | 6.583 | M+FA-H               | C <sub>28</sub> H <sub>42</sub> O <sub>2</sub>    | Gamma-Tocotrienol                                                                                | Quinone and hydroquinone lipids      | 1.168 | 0.040 |
| 473.326  | neg | 6.501 | M-H                  | C <sub>29</sub> H <sub>46</sub> O <sub>5</sub>    | (3beta,17alpha,23S)-17,23-Epoxy-3,28,29-trihydroxy-27-norlanost-8-en-24-one                      | Diterpenoids                         | 1.122 | 0.031 |
| 509.217  | neg | 6.446 | M+Na-2H              | C <sub>24</sub> H <sub>40</sub> O <sub>8</sub> S  | 7-Sulfocholic acid                                                                               | Bile acids, alcohols and derivatives | 1.245 | 0.004 |
| 421.2579 | neg | 6.412 | M+FA-H               | C <sub>23</sub> H <sub>36</sub> O <sub>4</sub>    | MG(0:0/20:5(5Z,8Z,11Z,14Z,17Z)/0:0)                                                              | -                                    | 1.139 | 0.014 |
| 501.2848 | neg | 6.398 | M-H <sub>2</sub> O-H | C <sub>29</sub> H <sub>44</sub> O <sub>8</sub>    | Digoxigenin monodigitoxoside                                                                     | Ethers                               | 1.181 | 0.003 |
| 503.3    | neg | 6.391 | M+FA-H               | C <sub>28</sub> H <sub>42</sub> O <sub>5</sub>    | Pubesanolide                                                                                     | Triterpenoids                        | 1.256 | 0.007 |
| 441.1749 | neg | 6.288 | M+FA-H               | C <sub>20</sub> H <sub>28</sub> O <sub>8</sub>    | 3,4,5-trihydroxy-6-([(6Z)-7-hydroxy-6-(phenylmethylidene)heptan-2-yl]oxy}oxane-2-carboxylic acid | 1-hydroxy-2-unsubstituted benzenoids | 0.844 | 0.016 |
| 379.2112 | neg | 6.172 | M+FA-H               | C <sub>20</sub> H <sub>30</sub> O <sub>4</sub>    | Prostaglandin B2                                                                                 | Eicosanoids                          | 1.089 | 0.021 |
| 359.0763 | neg | 6.104 | M+FA-H               | C <sub>17</sub> H <sub>14</sub> O <sub>6</sub>    | 2-(3,5-dimethoxyphenyl)-5,7-dihydroxy-4H-chromen-4-one                                           | O-methylated flavonoids              | 1.191 | 0.014 |
| 223.0992 | neg | 5.747 | M+FA-H               | C <sub>11</sub> H <sub>14</sub> O <sub>2</sub>    | 3-hydroxy-3-methyl-4-phenylbutan-2-one                                                           | Phenylpropanes                       | 0.966 | 0.015 |
| 383.1268 | neg | 5.563 | M+K-2H               | C <sub>20</sub> H <sub>26</sub> O <sub>5</sub>    | 19-Noraldosterone                                                                                | Hydroxysteroids                      | 1.134 | 0.019 |
| 295.1179 | neg | 5.501 | M+FA-H               | C <sub>14</sub> H <sub>18</sub> O <sub>4</sub>    | Helinorbisabone                                                                                  | Monoterpenoids                       | 1.083 | 0.049 |

|          |     |       |                                        |                                                               |                                                                     |                                           |       |       |
|----------|-----|-------|----------------------------------------|---------------------------------------------------------------|---------------------------------------------------------------------|-------------------------------------------|-------|-------|
| 403.1595 | neg | 5.193 | 2M-H                                   | C <sub>9</sub> H <sub>14</sub> O <sub>5</sub>                 | 3-(1-Hydroxymethyl-1-propenyl)pentanedioic acid                     | Fatty acids and conjugates                | 0.955 | 0.001 |
| 265.1071 | neg | 5.138 | M+FA-H                                 | C <sub>13</sub> H <sub>16</sub> O <sub>3</sub>                | (1Z)-2-hydroxy-1-(4-methoxyphenyl)-4-methylpent-1-en-3-one          | Anisoles                                  | 1.032 | 0.017 |
| 303.0531 | neg | 4.825 | M+FA-H                                 | C <sub>11</sub> H <sub>14</sub> O <sub>5</sub> S              | (3-methyl-2-oxo-4-phenylbutoxy)sulfonic acid                        | Phenylpropanes                            | 0.878 | 0.003 |
| 257.1385 | neg | 4.641 | M+FA-H                                 | C <sub>12</sub> H <sub>20</sub> O <sub>3</sub>                | Cucurbic acid                                                       | Lineolic acids and derivatives            | 1.051 | 0.035 |
| 327.1438 | neg | 4.300 | M-H                                    | C <sub>16</sub> H <sub>24</sub> O <sub>7</sub>                | PGDM                                                                | -                                         | 1.167 | 0.001 |
| 239.055  | neg | 3.761 | M+FA-H                                 | C <sub>10</sub> H <sub>10</sub> O <sub>4</sub>                | 3-(4-methoxyphenyl)oxirane-2-carboxylic acid                        | Anisoles                                  | 0.934 | 0.002 |
| 206.0448 | neg | 3.707 | M-H <sub>2</sub> O-H                   | C <sub>10</sub> H <sub>11</sub> NO <sub>5</sub>               | 2-{[hydroxy(2-hydroxy-4-methoxyphenyl)methylidene]amino}acetic acid | Benzoic acids and derivatives             | 1.054 | 0.002 |
| 240.0503 | neg | 3.489 | M+FA-H                                 | C <sub>9</sub> H <sub>9</sub> NO <sub>4</sub>                 | 2-Hydroxy-6,7-dimethoxybenzoxazole                                  | Benzoxazolones                            | 1.107 | 0.014 |
| 317.0324 | neg | 3.366 | M+FA-H                                 | C <sub>11</sub> H <sub>12</sub> O <sub>6</sub> S              | [(5-hydroxy-2-methyl-2H-chromen-2-yl)methoxy]sulfonic acid          | 1-benzopyrans                             | 0.911 | 0.026 |
| 198.0316 | neg | 3.305 | M-H                                    | C <sub>9</sub> H <sub>10</sub> ClNO <sub>2</sub>              | P-CHLOROPHENYLALANINE                                               | —                                         | 1.051 | 0.001 |
| 282.9884 | neg | 3.067 | M+Na-2H                                | C <sub>9</sub> H <sub>10</sub> O <sub>7</sub> S               | Dihydrocaffeic acid 3-sulfate                                       | Arylsulfates                              | 1.114 | 0.007 |
| 295.1385 | neg | 2.964 | 2M-H                                   | C <sub>6</sub> H <sub>12</sub> O <sub>4</sub>                 | Glycerol 1-propanoate                                               | Monoradylglycerols                        | 1.066 | 0.012 |
| 225.087  | neg | 2.882 | M-H                                    | C <sub>10</sub> H <sub>14</sub> N <sub>2</sub> O <sub>4</sub> | Porphobilinogen                                                     | Amines                                    | 1.028 | 0.001 |
| 524.1107 | neg | 2.628 | M+Cl                                   | C <sub>24</sub> H <sub>27</sub> NO <sub>8</sub> S             | 4-Hydroxy duloxetine glucuronide                                    | Carbohydrates and carbohydrate conjugates | 0.946 | 0.026 |
| 151.0248 | neg | 2.085 | M-H                                    | C <sub>5</sub> H <sub>4</sub> N <sub>4</sub> O <sub>2</sub>   | Xanthine                                                            | Purines and purine derivatives            | 1.064 | 0.040 |
| 413.2677 | pos | 6.525 | M+Na, M+K, 2M+NH <sub>4</sub> , 2M+Na, | C <sub>24</sub> H <sub>38</sub> O <sub>4</sub>                | Pregnan-20-one, 17-(acetyloxy)-3-hydroxy-6-methyl-, (3b,5b,6a)-     | -                                         | 1.114 | 0.001 |

|          |     |       |                                                                                    |                                                               |                                        |                                      |       |       |  |
|----------|-----|-------|------------------------------------------------------------------------------------|---------------------------------------------------------------|----------------------------------------|--------------------------------------|-------|-------|--|
|          |     |       | M+ACN+Na,<br>M+H                                                                   |                                                               |                                        |                                      |       |       |  |
| 426.323  | pos | 6.504 | M+NH <sub>4</sub> ,<br>M+Na,<br>2M+NH <sub>4</sub> ,<br>2M+H,<br>2M+Na             | C <sub>24</sub> H <sub>40</sub> O <sub>5</sub>                | 3a,7a,12b-Trihydroxy-5b-cholanoic acid | -                                    | 1.216 | 0.000 |  |
| 355.2643 | pos | 6.441 | M+H-2H <sub>2</sub> O,<br>M+NH <sub>4</sub> ,<br>M+ACN+Na,<br>M+H-H <sub>2</sub> O | C <sub>24</sub> H <sub>38</sub> O <sub>4</sub>                | 12-Ketodeoxycholic acid                | Bile acids, alcohols and derivatives | 1.103 | 0.000 |  |
| 371.259  | pos | 6.385 | 2M+NH <sub>4</sub> ,<br>2M+Na,<br>M+NH <sub>4</sub> ,<br>M+H-2H <sub>2</sub> O     | C <sub>24</sub> H <sub>38</sub> O <sub>5</sub>                | 3,7-Dihydroxy-12-oxocholanoic acid     | Bile acids, alcohols and derivatives | 1.117 | 0.003 |  |
| 265.1191 | pos | 3.374 | M+H, M+K                                                                           | C <sub>13</sub> H <sub>16</sub> N <sub>2</sub> O <sub>4</sub> | AFMK                                   | Carbonyl compounds                   | 0.893 | 0.044 |  |
| 243.0886 | pos | 5.374 | M+H, M+Na                                                                          | C <sub>12</sub> H <sub>10</sub> N <sub>4</sub> O <sub>2</sub> | Lumichrome                             | -                                    | 1.047 | 0.009 |  |
| 197.0817 | pos | 5.430 | M+CH <sub>3</sub> OH+H,<br>2M+NH <sub>4</sub>                                      | C <sub>9</sub> H <sub>8</sub> O <sub>3</sub>                  | 4-methoxy-1-benzofuran-6-ol            | —                                    | 0.942 | 0.036 |  |
| 336.1812 | pos | 6.183 | M+H-H <sub>2</sub> O,<br>M+CH <sub>3</sub> OH+H                                    | C <sub>11</sub> H <sub>21</sub> N <sub>5</sub> O <sub>5</sub> | Glutamylarginine                       | Amino acids, peptides, and analogues | 0.934 | 0.030 |  |
| 151.076  | pos | 6.037 | M+H-H <sub>2</sub> O,<br>M+ACN+Na                                                  | C <sub>9</sub> H <sub>12</sub> O <sub>3</sub>                 | 1-Ipomeanol                            | —                                    | 0.957 | 0.044 |  |
| 169.0866 | pos | 5.604 | M+H-2H <sub>2</sub> O,<br>M+H                                                      | C <sub>9</sub> H <sub>12</sub> O <sub>3</sub>                 | 4-Hydroxy-3-methoxyphenethyl alcohol   | Methoxyphenols                       | 0.964 | 0.005 |  |

|          |     |       |                                                 |                                                                 |                                                                |                                              |       |       |
|----------|-----|-------|-------------------------------------------------|-----------------------------------------------------------------|----------------------------------------------------------------|----------------------------------------------|-------|-------|
| 185.0817 | pos | 3.576 | M+H-H <sub>2</sub> O,<br>M+CH <sub>3</sub> OH+H | C <sub>8</sub> H <sub>8</sub> O <sub>3</sub>                    | Methyl furfuracrylate                                          | Fatty acid esters                            | 0.924 | 0.042 |
| 141.0107 | pos | 3.304 | M+H,<br>M+ACN+H                                 | C <sub>7</sub> H <sub>5</sub> ClO                               | 4-Chlorobenzaldehyde                                           | -                                            | 1.036 | 0.000 |
| 263.1038 | pos | 3.158 | M+H, M+NH <sub>4</sub>                          | C <sub>10</sub> H <sub>18</sub> N <sub>2</sub> O <sub>4</sub> S | Methionyl-Hydroxyproline                                       | Amino acids, peptides, and analogues         | 1.078 | 0.004 |
| 231.0984 | pos | 1.180 | M+H, M+K                                        | C <sub>9</sub> H <sub>14</sub> N <sub>2</sub> O <sub>5</sub>    | Aspartyl-Proline                                               | Amino acids, peptides, and analogues         | 0.929 | 0.031 |
| 154.0981 | pos | 1.146 | M+H-H <sub>2</sub> O,<br>M+H                    | C <sub>7</sub> H <sub>11</sub> N <sub>3</sub> O                 | Nomega-Acetylhistamine                                         | Carboxylic acid derivatives                  | 1.055 | 0.044 |
| 255.1349 | pos | 1.898 | M+NH <sub>4</sub> ,<br>M+ACN+H                  | C <sub>10</sub> H <sub>15</sub> NO <sub>4</sub>                 | 2-(2,6-dihydroxy-3,4-<br>dimethoxycyclohexylidene)acetonitrile | Alcohols and polyols                         | 0.952 | 0.020 |
| 240.11   | pos | 2.393 | M+H, M+Na                                       | C <sub>9</sub> H <sub>13</sub> N <sub>5</sub> O <sub>3</sub>    | 7,8-dihydro-L-Biopterin                                        | Pterins and derivatives                      | 0.961 | 0.013 |
| 400.1477 | pos | 2.602 | M+Na,<br>2M+NH <sub>4</sub>                     | C <sub>10</sub> H <sub>9</sub> NO <sub>3</sub>                  | Xi-2,3-Dihydro-2-oxo-1H-indole-3-acetic<br>acid                | Indolyl carboxylic acids and<br>derivatives  | 1.308 | 0.036 |
| 133.0978 | pos | 0.714 | M+H                                             | C <sub>5</sub> H <sub>12</sub> N <sub>2</sub> O <sub>2</sub>    | D-Ornithine                                                    | Amino acids, peptides, and analogues         | 1.086 | 0.003 |
| 162.1131 | pos | 0.979 | M+H                                             | C <sub>7</sub> H <sub>15</sub> NO <sub>3</sub>                  | L-Carnitine                                                    | Quaternary ammonium salts                    | 1.057 | 0.008 |
| 132.0774 | pos | 1.007 | M+H                                             | C <sub>4</sub> H <sub>9</sub> N <sub>3</sub> O <sub>2</sub>     | Creatine                                                       | Amino acids, peptides, and analogues         | 0.956 | 0.038 |
| 365.1066 | pos | 1.007 | M+Na                                            | C <sub>12</sub> H <sub>22</sub> O <sub>11</sub>                 | Sucrose                                                        | Carbohydrates and carbohydrate<br>conjugates | 1.166 | 0.004 |
| 278.0658 | pos | 2.400 | M+NH <sub>4</sub>                               | C <sub>6</sub> H <sub>13</sub> O <sub>9</sub> P                 | Dolichyl phosphate D-mannose                                   | Polyprenols                                  | 0.810 | 0.007 |
| 298.1152 | pos | 2.476 | M+H                                             | C <sub>11</sub> H <sub>15</sub> N <sub>5</sub> O <sub>5</sub>   | 7-Methylguanosine                                              | —                                            | 0.868 | 0.009 |
| 442.0996 | pos | 2.741 | 2M+ACN+H                                        | C <sub>8</sub> H <sub>8</sub> O <sub>6</sub>                    | 2,4,5-trihydroxy-3-methoxybenzoic acid                         | Quinone and hydroquinone lipids              | 1.077 | 0.021 |
| 232.1191 | pos | 2.755 | M+H                                             | C <sub>10</sub> H <sub>17</sub> NO <sub>5</sub>                 | Isovalerylglutamic acid                                        | Amino acids, peptides, and analogues         | 1.106 | 0.007 |
| 231.1713 | pos | 3.019 | M+H                                             | C <sub>11</sub> H <sub>22</sub> N <sub>2</sub> O <sub>3</sub>   | Leucyl-Valine                                                  | Amino acids, peptides, and analogues         | 1.045 | 0.048 |
| 179.071  | pos | 3.054 | M+H                                             | C <sub>10</sub> H <sub>10</sub> O <sub>3</sub>                  | (R)-(-)-Mellein                                                | -                                            | 0.978 | 0.000 |
| 313.1404 | pos | 3.339 | M+H                                             | C <sub>19</sub> H <sub>20</sub> O <sub>4</sub>                  | M-(beta-Acetyl-alpha-ethyl-p-<br>hydroxyphenethyl)benzoic acid | -                                            | 0.955 | 0.025 |

|          |     |       |                        |                                                               |                                                                                            |                                           |       |       |
|----------|-----|-------|------------------------|---------------------------------------------------------------|--------------------------------------------------------------------------------------------|-------------------------------------------|-------|-------|
| 278.1146 | pos | 3.611 | M+H-H <sub>2</sub> O   | C <sub>13</sub> H <sub>17</sub> N <sub>3</sub> O <sub>5</sub> | Asparaginy-Tyrosine                                                                        | Amino acids, peptides, and analogues      | 1.109 | 0.017 |
| 195.0773 | pos | 3.917 | M+H                    | C <sub>9</sub> H <sub>10</sub> N <sub>2</sub> O <sub>3</sub>  | 2-Pyridylacetyl glycine                                                                    | -                                         | 0.942 | 0.030 |
| 158.0607 | pos | 4.439 | M+H-H <sub>2</sub> O   | C <sub>10</sub> H <sub>9</sub> NO <sub>2</sub>                | Indoleacetic acid                                                                          | Indolyl carboxylic acids and derivatives  | 0.948 | 0.003 |
| 410.1821 | pos | 4.683 | M+ACN+H                | C <sub>18</sub> H <sub>24</sub> O <sub>8</sub>                | 3,4,5-trihydroxy-6- {[ (1E)-1-(4-methoxyphenyl)pent-1-en-3-yl]oxy} oxane-2-carboxylic acid | Carbohydrates and carbohydrate conjugates | 0.812 | 0.016 |
| 299.1289 | pos | 4.718 | M+H                    | C <sub>18</sub> H <sub>18</sub> O <sub>4</sub>                | (+/-)-Enterolactone                                                                        | Tetrahydrofuran lignans                   | 0.932 | 0.006 |
| 558.2721 | pos | 5.018 | 2M+ACN+H               | C <sub>11</sub> H <sub>18</sub> N <sub>2</sub> O <sub>5</sub> | Gamma-L-Glutamyl-L-pipecolic acid                                                          | Amino acids, peptides, and analogues      | 1.122 | 0.025 |
| 133.0654 | pos | 5.025 | M+H                    | C <sub>9</sub> H <sub>8</sub> O                               | 2-Indanone                                                                                 | -                                         | 0.968 | 0.001 |
| 273.0767 | pos | 5.213 | M+H                    | C <sub>15</sub> H <sub>12</sub> O <sub>5</sub>                | Naringenin chalcone                                                                        | Chalcones and dihydrochalcones            | 0.937 | 0.032 |
| 310.2024 | pos | 5.834 | M+NH <sub>4</sub>      | C <sub>17</sub> H <sub>24</sub> O <sub>4</sub>                | Acetylbalchanolide                                                                         | Terpene lactones                          | 1.054 | 0.006 |
| 287.0926 | pos | 5.890 | M+H                    | C <sub>16</sub> H <sub>14</sub> O <sub>5</sub>                | Sakuranetin                                                                                | O-methylated flavonoids                   | 1.053 | 0.016 |
| 210.1127 | pos | 6.002 | M+ACN+H                | C <sub>9</sub> H <sub>12</sub> O <sub>3</sub>                 | 4-Ipomeanol                                                                                | Carbonyl compounds                        | 0.951 | 0.004 |
| 370.1671 | pos | 6.093 | M+NH <sub>4</sub>      | C <sub>21</sub> H <sub>20</sub> O <sub>5</sub>                | Artonol A                                                                                  | 1-benzopyrans                             | 1.150 | 0.002 |
| 300.218  | pos | 6.100 | M+H-H <sub>2</sub> O   | C <sub>16</sub> H <sub>31</sub> NO <sub>5</sub>               | 3-hydroxynonanoyl carnitine                                                                | Fatty acid esters                         | 1.036 | 0.001 |
| 467.3141 | pos | 6.392 | M+H-H <sub>2</sub> O   | C <sub>30</sub> H <sub>44</sub> O <sub>5</sub>                | Ganolucidic acid E                                                                         | Triterpenoids                             | 1.139 | 0.001 |
| 389.2696 | pos | 6.399 | M+H                    | C <sub>24</sub> H <sub>36</sub> O <sub>4</sub>                | 1alpha-hydroxy-25,26,27-trinorvitamin D3 24-carboxylic acid                                | -                                         | 1.159 | 0.008 |
| 151.1124 | pos | 6.406 | M+H                    | C <sub>10</sub> H <sub>14</sub> O                             | Carvone                                                                                    | Monoterpenoids                            | 0.931 | 0.000 |
| 437.2665 | pos | 6.659 | M+H                    | C <sub>21</sub> H <sub>41</sub> O <sub>7</sub> P              | 1-Oleoyl Lysophosphatidic Acid (sodium salt)                                               | -                                         | 1.226 | 0.012 |
| 540.2988 | pos | 6.750 | M+H-2H <sub>2</sub> O  | C <sub>32</sub> H <sub>41</sub> N <sub>5</sub> O <sub>5</sub> | Mauritine A                                                                                | Amino acids, peptides, and analogues      | 1.258 | 0.000 |
| 666.6055 | pos | 7.701 | M+NH <sub>4</sub>      | C <sub>41</sub> H <sub>76</sub> O <sub>5</sub>                | DG(20:1(11Z)/18:1(11Z)/0:0)                                                                | Diradylglycerols                          | 1.031 | 0.000 |
| 708.5145 | pos | 7.526 | M+CH <sub>3</sub> OH+H | C <sub>36</sub> H <sub>70</sub> NO <sub>8</sub> P             | PE(15:0/16:1(9Z))                                                                          | Glycerophosphoethanolamines               | 1.029 | 0.000 |

|          |     |       |                         |                                                               |                                                                                                                    |                                      |       |       |
|----------|-----|-------|-------------------------|---------------------------------------------------------------|--------------------------------------------------------------------------------------------------------------------|--------------------------------------|-------|-------|
| 638.5743 | pos | 7.512 | M+NH <sub>4</sub>       | C <sub>39</sub> H <sub>72</sub> O <sub>5</sub>                | DG(18:0/18:2(9Z,12Z)/0:0)                                                                                          | Lineolic acids and derivatives       | 1.034 | 0.000 |
| 478.2947 | pos | 6.694 | M+ACN+H                 | C <sub>21</sub> H <sub>41</sub> O <sub>7</sub> P              | LysoPA(0:0/18:1(9Z))                                                                                               | Glycerophosphates                    | 1.123 | 0.017 |
| 500.2615 | pos | 6.638 | M+ACN+H                 | C <sub>26</sub> H <sub>34</sub> O <sub>7</sub>                | 6-hydroxy-5- {[ (3-hydroxy-2-oxo-2H-chromen-7-yl)oxy]methyl}-1,1,4a,6-tetramethyl-decahydronaphthalen-2-yl acetate | Hydroxycoumarins                     | 1.231 | 0.002 |
| 460.2711 | pos | 6.462 | M+NH <sub>4</sub>       | C <sub>26</sub> H <sub>34</sub> O <sub>6</sub>                | 3-O-Acetylepisamarcandin                                                                                           | —                                    | 1.034 | 0.045 |
| 213.1647 | pos | 6.441 | M+H-2H <sub>2</sub> O   | C <sub>16</sub> H <sub>24</sub> O <sub>2</sub>                | 2-Phenylethyl octanoate                                                                                            | Fatty acid esters                    | 1.158 | 0.001 |
| 423.2756 | pos | 6.413 | M+H                     | C <sub>24</sub> H <sub>38</sub> O <sub>6</sub>                | 3alpha,7beta,12alpha-Trihydroxy-6-oxo-5alpha-cholan-24-oic Acid                                                    | -                                    | 1.159 | 0.021 |
| 405.2646 | pos | 6.406 | M+H                     | C <sub>24</sub> H <sub>36</sub> O <sub>5</sub>                | 7a,12a-Dihydroxy-3-oxo-4-cholenoic acid                                                                            | Bile acids, alcohols and derivatives | 1.140 | 0.016 |
| 218.1548 | pos | 6.197 | M+H                     | C <sub>14</sub> H <sub>19</sub> NO                            | ETHOXYQUIN                                                                                                         | Quinolones and derivatives           | 0.825 | 0.014 |
| 414.1569 | pos | 6.128 | M+ACN+H                 | C <sub>20</sub> H <sub>20</sub> O <sub>7</sub>                | 6-(2,4-dihydroxyphenyl)-2-(2,6-dihydroxyphenyl)-5-hydroxy-4-methylcyclohex-3-ene-1-carboxylic acid                 | Benzenediols                         | 1.207 | 0.000 |
| 406.2966 | pos | 6.114 | M+H                     | C <sub>24</sub> H <sub>39</sub> NO <sub>4</sub>               | N-Arachidonoyl-3-hydroxy-gamma-Aminobutyric Acid                                                                   | -                                    | 1.187 | 0.007 |
| 299.0929 | pos | 5.437 | M+H-H <sub>2</sub> O    | C <sub>17</sub> H <sub>16</sub> O <sub>6</sub>                | 5,7-dihydroxy-6-methoxy-2-(4-methoxyphenyl)-3,4-dihydro-2H-1-benzopyran-4-one                                      | O-methylated flavonoids              | 1.206 | 0.004 |
| 134.0971 | pos | 5.088 | M+H                     | C <sub>9</sub> H <sub>11</sub> N                              | 2-Methylindoline                                                                                                   | -                                    | 0.925 | 0.014 |
| 252.1604 | pos | 5.081 | M+ACN+H                 | C <sub>12</sub> H <sub>18</sub> O <sub>3</sub>                | Jasmonic acid                                                                                                      | Lineolic acids and derivatives       | 0.966 | 0.045 |
| 372.2418 | pos | 4.342 | 2M+3H <sub>2</sub> O+2H | C <sub>15</sub> H <sub>30</sub> N <sub>6</sub> O <sub>4</sub> | Kinetensin 1-3                                                                                                     | Amino acids, peptides, and analogues | 1.214 | 0.001 |
| 155.1073 | pos | 4.314 | M+H                     | C <sub>9</sub> H <sub>14</sub> O <sub>2</sub>                 | 2,6-nonadienoic acid                                                                                               | -                                    | 0.959 | 0.009 |
| 347.1689 | pos | 4.084 | M+ACN+H                 | C <sub>15</sub> H <sub>19</sub> N <sub>3</sub> O <sub>4</sub> | Threoninyl-Tryptophan                                                                                              | Amino acids, peptides, and analogues | 1.096 | 0.014 |
| 191.1186 | pos | 4.070 | M+H                     | C <sub>11</sub> H <sub>14</sub> N <sub>2</sub> O              | CYTISINE                                                                                                           | -                                    | 0.785 | 0.008 |



|          |     |       |                        |                                                               |                                                          |                                          |       |       |
|----------|-----|-------|------------------------|---------------------------------------------------------------|----------------------------------------------------------|------------------------------------------|-------|-------|
| 192.1027 | pos | 4.070 | M+H                    | C <sub>11</sub> H <sub>13</sub> NO <sub>2</sub>               | 5-Methoxytryptophol                                      | Indoles                                  | 0.830 | 0.008 |
| 326.1974 | pos | 3.903 | M+NH <sub>4</sub>      | C <sub>17</sub> H <sub>24</sub> O <sub>5</sub>                | Dihydrocumambrin A                                       | Terpene lactones                         | 1.073 | 0.026 |
| 269.1504 | pos | 3.840 | M+H                    | C <sub>13</sub> H <sub>20</sub> N <sub>2</sub> O <sub>4</sub> | Dihydroxymelphalan                                       | -                                        | 0.940 | 0.007 |
| 208.0613 | pos | 3.701 | M+H                    | C <sub>10</sub> H <sub>9</sub> NO <sub>4</sub>                | 2-Formaminobenzoylacetate                                | -                                        | 1.038 | 0.003 |
| 182.0456 | pos | 3.666 | M+H                    | C <sub>8</sub> H <sub>7</sub> NO <sub>4</sub>                 | 2-Methyl-3-hydroxy-5-formylpyridine-4-carboxylate        | Pyridinecarboxylic acids and derivatives | 0.915 | 0.045 |
| 127.0397 | pos | 3.430 | M+H                    | C <sub>6</sub> H <sub>6</sub> O <sub>3</sub>                  | 4-HYDROXY-6-METHYLPYRAN-2-ONE                            | -                                        | 1.066 | 0.003 |
| 294.1454 | pos | 3.284 | M+ACN+H                | C <sub>12</sub> H <sub>16</sub> N <sub>2</sub> O <sub>4</sub> | 3'-Hydroxyhexobarbital                                   | Pyrimidines and pyrimidine derivatives   | 0.938 | 0.013 |
| 122.0278 | pos | 3.200 | M+H                    | C <sub>3</sub> H <sub>7</sub> NO <sub>2</sub> S               | L-Cysteine                                               | Amino acids, peptides, and analogues     | 0.929 | 0.008 |
| 276.0699 | pos | 3.082 | M+H                    | C <sub>10</sub> H <sub>13</sub> NO <sub>8</sub>               | 3-beta-D-Glucopyranuronosyloxy-5-methylisoxazole         | -                                        | 1.316 | 0.004 |
| 203.1399 | pos | 2.887 | M+H                    | C <sub>9</sub> H <sub>18</sub> N <sub>2</sub> O <sub>3</sub>  | ALANYL-dl-LEUCINE                                        | -                                        | 1.089 | 0.007 |
| 456.2106 | pos | 2.790 | M+H-H <sub>2</sub> O   | C <sub>25</sub> H <sub>27</sub> N <sub>7</sub> O <sub>3</sub> | CD 1790                                                  | Purines and purine derivatives           | 1.077 | 0.013 |
| 256.0822 | pos | 2.783 | M+H                    | C <sub>11</sub> H <sub>13</sub> NO <sub>6</sub>               | Nicotinate D-ribonucleoside                              | -                                        | 0.960 | 0.036 |
| 196.0838 | pos | 2.393 | M+H                    | C <sub>7</sub> H <sub>9</sub> N <sub>5</sub> O <sub>2</sub>   | 2-Amino-4-hydroxy-6-(hydroxymethyl)-7,8-dihydropteridine | -                                        | 0.946 | 0.008 |
| 248.1502 | pos | 2.197 | M+H                    | C <sub>11</sub> H <sub>21</sub> NO <sub>5</sub>               | (R)-3-hydroxybutyrylcarnitine                            | Fatty acid esters                        | 1.067 | 0.008 |
| 200.1039 | pos | 2.190 | M+H                    | C <sub>8</sub> H <sub>13</sub> N <sub>3</sub> O <sub>3</sub>  | Gamma-Glutamyl-beta-aminopropiononitrile                 | Amino acids, peptides, and analogues     | 0.963 | 0.024 |
| 204.1239 | pos | 1.173 | M+H                    | C <sub>9</sub> H <sub>17</sub> NO <sub>4</sub>                | Acetylcarnitine                                          | Fatty acid esters                        | 1.131 | 0.000 |
| 207.1711 | pos | 1.035 | M+CH <sub>3</sub> OH+H | C <sub>8</sub> H <sub>18</sub> N <sub>2</sub> O <sub>2</sub>  | Ne,Ne dimethyllysine                                     | Amino acids, peptides, and analogues     | 0.878 | 0.001 |
| 118.0659 | pos | 3.298 | M+H                    | C <sub>8</sub> H <sub>7</sub> N                               | Indole                                                   | Indoles                                  | 1.024 | 0.000 |

**Supplementary Table S2** Identification of the most discriminant metabolomic variables between IR group and Control

| group    |      |                |                                    |                                                                 |                                                                                                      |                                           |                          |         |  |  |  |
|----------|------|----------------|------------------------------------|-----------------------------------------------------------------|------------------------------------------------------------------------------------------------------|-------------------------------------------|--------------------------|---------|--|--|--|
| m/z      | Mode | Retention time | Adducts                            | Formula                                                         | Metabolite                                                                                           | Subclass                                  | Fold change (PC/Control) | P value |  |  |  |
| 407.2789 | neg  | 6.412          | M-H, M+Cl, M+FA-H, 2M-H            | C <sub>24</sub> H <sub>40</sub> O <sub>5</sub>                  | Cholic acid                                                                                          | Bile acids, alcohols and derivatives      | 1.135                    | 0.005   |  |  |  |
| 283.0813 | neg  | 4.539          | M-H, 2M-H, M-H <sub>2</sub> O-H    | C <sub>13</sub> H <sub>16</sub> O <sub>7</sub>                  | P-Cresol glucuronide                                                                                 | Carbohydrates and carbohydrate conjugates | 1.061                    | 0.032   |  |  |  |
| 296.6158 | neg  | 6.172          | M-2H, M-H, M+Na-2H                 | C <sub>26</sub> H <sub>45</sub> NO <sub>10</sub> S <sub>2</sub> | Taurocholic acid 3-sulfate                                                                           | Bile acids, alcohols and derivatives      | 1.079                    | 0.003   |  |  |  |
| 405.2631 | neg  | 6.425          | M-H, M+Cl, 2M-H                    | C <sub>24</sub> H <sub>38</sub> O <sub>5</sub>                  | 7-Ketodeoxycholic acid                                                                               | Bile acids, alcohols and derivatives      | 1.147                    | 0.008   |  |  |  |
| 311.2218 | neg  | 6.631          | M-H, M+Na-2H, M-H <sub>2</sub> O-H | C <sub>18</sub> H <sub>32</sub> O <sub>4</sub>                  | 9,10-DiHODE                                                                                          | Lineolic acids and derivatives            | 1.099                    | 0.049   |  |  |  |
| 461.1074 | neg  | 6.152          | M-H, 2M-H, M+Na-2H                 | C <sub>22</sub> H <sub>22</sub> O <sub>11</sub>                 | 6-{3,5-dihydroxy-4-[3-(4-methoxyphenyl)prop-2-enoyl]phenoxy}-3,4,5-trihydroxyoxane-2-carboxylic acid | Flavonoid glycosides                      | 1.484                    | 0.000   |  |  |  |

|          |     |       |                              |                                                                 |                                                                                                    |                                           |       |       |
|----------|-----|-------|------------------------------|-----------------------------------------------------------------|----------------------------------------------------------------------------------------------------|-------------------------------------------|-------|-------|
| 289.0378 | neg | 4.198 | M-H, M+Na-2H                 | C <sub>11</sub> H <sub>14</sub> O <sub>7</sub> S                | (5,7-dihydroxy-2,2-dimethyl-3,4-dihydro-2H-1-benzopyran-4-yl)oxidanesulfonic acid                  | 1-benzopyrans                             | 0.958 | 0.045 |
| 391.2843 | neg | 6.528 | M-H, M+FA-H                  | C <sub>24</sub> H <sub>40</sub> O <sub>4</sub>                  | Deoxycholic acid                                                                                   | Bile acids, alcohols and derivatives      | 1.187 | 0.009 |
| 307.1904 | neg | 6.583 | M-H <sub>2</sub> O-H, M-H    | C <sub>18</sub> H <sub>28</sub> O <sub>4</sub>                  | Corchorifatty acid A                                                                               | Lineolic acids and derivatives            | 1.092 | 0.026 |
| 327.1074 | neg | 6.172 | M-H <sub>2</sub> O-H, M+FA-H | C <sub>14</sub> H <sub>18</sub> O <sub>6</sub>                  | 2-[4,6-dihydroxy-3-(4-hydroxy-3-methylbut-2-en-1-yl)-2-methoxyphenyl]acetic acid                   | Phenylacetic acids                        | 0.858 | 0.001 |
| 216.0502 | neg | 1.187 | M-H                          | C <sub>8</sub> H <sub>11</sub> NO <sub>6</sub>                  | Lycoperdic acid                                                                                    | Amino acids, peptides, and analogues      | 0.932 | 0.028 |
| 362.0495 | neg | 2.449 | M-H                          | C <sub>10</sub> H <sub>14</sub> N <sub>5</sub> O <sub>8</sub> P | Guanidylic acid (guanosine monophosphate)                                                          | -                                         | 1.203 | 0.021 |
| 269.1247 | neg | 2.476 | M+FA-H                       | C <sub>12</sub> H <sub>18</sub> NO <sub>3</sub> +               | (4-Hydroxybenzoyl)choline                                                                          | Benzoic acids and derivatives             | 0.943 | 0.020 |
| 146.0234 | neg | 2.490 | M-H <sub>2</sub> O-H         | C <sub>8</sub> H <sub>7</sub> NO <sub>3</sub>                   | 4-Pyridoxolactone                                                                                  | Pyridinecarboxylic acids and derivatives  | 1.066 | 0.025 |
| 282.0833 | neg | 2.717 | M-H                          | C <sub>10</sub> H <sub>13</sub> N <sub>5</sub> O <sub>5</sub>   | Guanosine                                                                                          | -                                         | 1.097 | 0.012 |
| 188.9851 | neg | 3.107 | M-H                          | C <sub>6</sub> H <sub>6</sub> O <sub>5</sub> S                  | Pyrocatechol sulfate                                                                               | Arylsulfates                              | 0.965 | 0.028 |
| 269.0657 | neg | 3.563 | M-H                          | C <sub>12</sub> H <sub>14</sub> O <sub>7</sub>                  | Phenyl glucuronide                                                                                 | Carbohydrates and carbohydrate conjugates | 1.114 | 0.027 |
| 153.018  | neg | 3.734 | M-H                          | C <sub>7</sub> H <sub>6</sub> O <sub>4</sub>                    | Gentisic acid                                                                                      | Benzoic acids and derivatives             | 0.899 | 0.042 |
| 327.1074 | neg | 4.055 | M-H <sub>2</sub> O-H         | C <sub>15</sub> H <sub>22</sub> O <sub>9</sub>                  | Aucubin                                                                                            | Terpene glycosides                        | 0.842 | 0.029 |
| 593.1492 | neg | 4.109 | M-H <sub>2</sub> O-H         | C <sub>27</sub> H <sub>32</sub> O <sub>16</sub>                 | 6-{[3,5-dihydroxy-2-(3-hydroxyphenyl)-6-[3,4,5-trihydroxy-6-(hydroxymethyl)oxan-2-yl]-3,4-dihydro- | Flavonoid glycosides                      | 1.213 | 0.005 |

|          |     |       |                      |                                                               |                                                                                                                      |                                           |       |       |
|----------|-----|-------|----------------------|---------------------------------------------------------------|----------------------------------------------------------------------------------------------------------------------|-------------------------------------------|-------|-------|
| 387.1646 | neg | 4.218 | M+FA-H               | C <sub>17</sub> H <sub>26</sub> O <sub>7</sub>                | 2H-1-benzopyran-7-yl]oxy}-3,4,5-trihydroxyoxane-2-carboxylic acid<br>Jasmolone glucoside                             | Carbohydrates and carbohydrate conjugates | 0.871 | 0.043 |
| 497.0742 | neg | 4.389 | M-H                  | C <sub>21</sub> H <sub>22</sub> O <sub>12</sub> S             | 3-{7-[(6-carboxy-3,4,5-trihydroxyoxan-2-yl)oxy]-3-hydroxy-5-sulfinyl-3,4-dihydro-2H-1-benzopyran-2-yl}benzen-1-olate | Flavonoid glycosides                      | 1.087 | 0.012 |
| 417.1399 | neg | 4.505 | M+Na-2H              | C <sub>22</sub> H <sub>24</sub> N <sub>2</sub> O <sub>5</sub> | Benazeprilat                                                                                                         | Amino acids, peptides, and analogues      | 0.887 | 0.041 |
| 345.063  | neg | 4.798 | M-H                  | C <sub>14</sub> H <sub>18</sub> O <sub>8</sub> S              | 3-hydroxy-3-[4-hydroxy-3-(3-methylbut-2-en-1-yl)phenyl]-2-(sulfoxy)propanoic acid                                    | —                                         | 1.244 | 0.000 |
| 271.0602 | neg | 5.234 | M-H                  | C <sub>15</sub> H <sub>12</sub> O <sub>5</sub>                | (+/-)-Naringenin                                                                                                     | -                                         | 0.831 | 0.029 |
| 431.1907 | neg | 5.275 | M+FA-H               | C <sub>19</sub> H <sub>30</sub> O <sub>8</sub>                | Corchoionol C 9-glucoside                                                                                            | Fatty acyl glycosides                     | 1.053 | 0.002 |
| 347.1699 | neg | 5.412 | M-H <sub>2</sub> O-H | C <sub>16</sub> H <sub>30</sub> O <sub>9</sub>                | (1S,2S,4R,8S)-p-Menthane-1,2,8,9-tetrol 2-glucoside                                                                  | Terpene glycosides                        | 1.069 | 0.008 |
| 369.1177 | neg | 5.419 | M-H                  | C <sub>17</sub> H <sub>22</sub> O <sub>9</sub>                | 6-[2,4-dihydroxy-3-(3-methylbut-2-en-1-yl)phenoxy]-3,4,5-trihydroxyoxane-2-carboxylic acid                           | Carbohydrates and carbohydrate conjugates | 0.739 | 0.001 |
| 306.1184 | neg | 5.645 | M+FA-H               | C <sub>11</sub> H <sub>19</sub> NO <sub>6</sub>               | Epidermin                                                                                                            | Carbohydrates and carbohydrate conjugates | 1.279 | 0.049 |
| 405.1752 | neg | 5.919 | 2M-H                 | C <sub>7</sub> H <sub>13</sub> N <sub>3</sub> O <sub>4</sub>  | Glycyl-Gamma-glutamate                                                                                               | Amino acids, peptides, and analogues      | 0.949 | 0.002 |
| 231.0322 | neg | 6.138 | M-H                  | C <sub>9</sub> H <sub>12</sub> O <sub>5</sub> S               | (4-ethyl-2-methoxyphenyl)oxidanesulfonic acid                                                                        | Arylsulfates                              | 0.868 | 0.000 |

|          |     |       |                      |                                                   |                                                                               |                                      |       |       |
|----------|-----|-------|----------------------|---------------------------------------------------|-------------------------------------------------------------------------------|--------------------------------------|-------|-------|
| 471.3098 | neg | 6.460 | M+FA-H               | C <sub>28</sub> H <sub>42</sub> O <sub>3</sub>    | (3beta,5alpha,6alpha,7alpha,22E,24R)-5,6-Epoxyergosta-8,14,22-triene-3,7-diol | Ergostane steroids                   | 1.148 | 0.004 |
| 645.4927 | neg | 6.480 | 2M+FA-H              | C <sub>21</sub> H <sub>32</sub> O                 | Cardanoldiene                                                                 | 1-hydroxy-4-unsubstituted benzenoids | 1.102 | 0.034 |
| 271.1906 | neg | 6.542 | M+FA-H               | C <sub>14</sub> H <sub>26</sub> O <sub>2</sub>    | Myristoleic acid                                                              | Fatty acids and conjugates           | 1.122 | 0.026 |
| 485.3256 | neg | 6.590 | M-H                  | C <sub>30</sub> H <sub>46</sub> O <sub>5</sub>    | Lucyin A                                                                      | Triterpenoids                        | 1.157 | 0.015 |
| 323.2216 | neg | 6.624 | M-H                  | C <sub>19</sub> H <sub>32</sub> O <sub>4</sub>    | TOFA                                                                          | -                                    | 1.157 | 0.033 |
| 453.2993 | neg | 6.638 | M+Na-2H              | C <sub>27</sub> H <sub>44</sub> O <sub>4</sub>    | (25R)-3beta,4beta-dihydroxycholest-5-en-26-oate(1-)                           | Bile acids, alcohols and derivatives | 1.168 | 0.013 |
| 450.2603 | neg | 6.665 | M-H                  | C <sub>21</sub> H <sub>42</sub> NO <sub>7</sub> P | LysoPE(16:1(9Z)/0:0)                                                          | Glycerophosphoethanolamines          | 1.220 | 0.024 |
| 478.2921 | neg | 6.789 | M-H                  | C <sub>23</sub> H <sub>46</sub> NO <sub>7</sub> P | PE(18:1(9Z)/0:0)                                                              | -                                    | 1.186 | 0.038 |
| 462.2974 | neg | 6.858 | M-H <sub>2</sub> O-H | C <sub>23</sub> H <sub>48</sub> NO <sub>7</sub> P | LysoPE(18:0/0:0)                                                              | Glycerophosphoethanolamines          | 1.149 | 0.007 |
| 271.227  | neg | 6.878 | M-H                  | C <sub>16</sub> H <sub>32</sub> O <sub>3</sub>    | 2-hydroxyhexadecanoic acid                                                    | Fatty acids and conjugates           | 1.077 | 0.031 |
| 299.2581 | neg | 7.002 | M-H                  | C <sub>18</sub> H <sub>36</sub> O <sub>3</sub>    | DL-2-hydroxy stearic acid                                                     | -                                    | 1.104 | 0.010 |
| 436.2817 | neg | 6.844 | M-H                  | C <sub>21</sub> H <sub>44</sub> NO <sub>6</sub> P | PE(P-16:0e/0:0)                                                               | -                                    | 1.154 | 0.000 |
| 452.2767 | neg | 6.782 | M-H                  | C <sub>21</sub> H <sub>44</sub> NO <sub>7</sub> P | PE(16:0/0:0)                                                                  | Glycerophosphoethanolamines          | 1.301 | 0.021 |
| 498.2878 | neg | 6.727 | M+FA-H               | C <sub>21</sub> H <sub>44</sub> NO <sub>7</sub> P | LysoPE(0:0/16:0)                                                              | Glycerophosphoethanolamines          | 1.314 | 0.011 |
| 455.3152 | neg | 6.583 | M+FA-H               | C <sub>28</sub> H <sub>42</sub> O <sub>2</sub>    | Gamma-Tocotrienol                                                             | Quinone and hydroquinone lipids      | 1.268 | 0.000 |
| 473.326  | neg | 6.501 | M-H                  | C <sub>29</sub> H <sub>46</sub> O <sub>5</sub>    | (3beta,17alpha,23S)-17,23-Epoxy-3,28,29-trihydroxy-27-norlanost-8-en-24-one   | Diterpenoids                         | 1.156 | 0.001 |
| 435.2736 | neg | 6.480 | M+FA-H               | C <sub>24</sub> H <sub>38</sub> O <sub>4</sub>    | 12alpha-hydroxy-3-oxo-5beta-cholan-24-oic Acid                                | Bile acids, alcohols and derivatives | 1.109 | 0.029 |
| 509.217  | neg | 6.446 | M+Na-2H              | C <sub>24</sub> H <sub>40</sub> O <sub>8</sub> S  | 7-Sulfocholic acid                                                            | Bile acids, alcohols and derivatives | 1.195 | 0.019 |

|          |     |       |                      |                                                 |                                                                                                     |                                           |       |       |
|----------|-----|-------|----------------------|-------------------------------------------------|-----------------------------------------------------------------------------------------------------|-------------------------------------------|-------|-------|
| 421.2579 | neg | 6.412 | M+FA-H               | C <sub>23</sub> H <sub>36</sub> O <sub>4</sub>  | MG(0:0/20:5(5Z,8Z,11Z,14Z,17Z)/0:0)                                                                 | —                                         | 1.119 | 0.025 |
| 283.0603 | neg | 6.412 | M-H                  | C <sub>16</sub> H <sub>12</sub> O <sub>5</sub>  | Acacetin                                                                                            | O-methylated flavonoids                   | 1.286 | 0.001 |
| 501.2848 | neg | 6.398 | M-H <sub>2</sub> O-H | C <sub>29</sub> H <sub>44</sub> O <sub>8</sub>  | Digoxigenin monodigitoxoside                                                                        | Ethers                                    | 1.124 | 0.011 |
| 503.3    | neg | 6.391 | M+FA-H               | C <sub>28</sub> H <sub>42</sub> O <sub>5</sub>  | Pubesanolide                                                                                        | Triterpenoids                             | 1.211 | 0.013 |
| 517.3152 | neg | 6.371 | M+FA-H               | C <sub>29</sub> H <sub>44</sub> O <sub>5</sub>  | (3beta,17alpha,23R)-17,23-Epoxy-3,29-dihydroxy-27-norlanost-8-ene-15,24-dione                       | Triterpenoids                             | 1.168 | 0.037 |
| 441.1749 | neg | 6.288 | M+FA-H               | C <sub>20</sub> H <sub>28</sub> O <sub>8</sub>  | 3,4,5-trihydroxy-6- {[ (6Z)-7-hydroxy-6-(phenylmethylidene)heptan-2-yl]oxy} oxane-2-carboxylic acid | 1-hydroxy-2-unsubstituted benzenoids      | 0.822 | 0.002 |
| 309.1333 | neg | 6.240 | M+FA-H               | C <sub>15</sub> H <sub>20</sub> O <sub>4</sub>  | Tavulin                                                                                             | Terpene lactones                          | 0.837 | 0.010 |
| 671.3966 | neg | 6.165 | M+Cl                 | C <sub>36</sub> H <sub>60</sub> O <sub>9</sub>  | Ginsenoside Rh7                                                                                     | Triterpenoids                             | 1.164 | 0.009 |
| 397.1125 | neg | 6.145 | M-H <sub>2</sub> O-H | C <sub>18</sub> H <sub>24</sub> O <sub>11</sub> | 3,4,5-trihydroxy-6- {[4-hydroxy-5-(4-hydroxy-3-methoxyphenyl)pentanoyl]oxy} oxane-2-carboxylic acid | Carbohydrates and carbohydrate conjugates | 0.890 | 0.042 |
| 239.0915 | neg | 6.056 | M-H                  | C <sub>12</sub> H <sub>16</sub> O <sub>5</sub>  | CMPF                                                                                                | Fatty acids and conjugates                | 0.941 | 0.009 |
| 263.1279 | neg | 5.816 | M-H                  | C <sub>15</sub> H <sub>20</sub> O <sub>4</sub>  | (+/-)Absciscic Acid                                                                                 | -                                         | 0.897 | 0.041 |
| 399.128  | neg | 5.768 | M+FA-H               | C <sub>17</sub> H <sub>22</sub> O <sub>8</sub>  | Methyl helianthoate F glucoside                                                                     | Fatty acyl glycosides                     | 0.834 | 0.035 |
| 359.1699 | neg | 5.631 | M+FA-H               | C <sub>16</sub> H <sub>26</sub> O <sub>6</sub>  | Perilloside A                                                                                       | Terpene glycosides                        | 1.061 | 0.023 |
| 248.0918 | neg | 5.138 | M+FA-H               | C <sub>12</sub> H <sub>13</sub> NO <sub>2</sub> | 5-(2-Furanyl)-1,2,3,4,5,6-hexahydro-7H-cyclopenta[b]pyridin-7-one                                   | Hydropyridines                            | 0.937 | 0.039 |
| 376.1424 | neg | 4.976 | M+FA-H               | C <sub>18</sub> H <sub>21</sub> NO <sub>5</sub> | 2,5-dihydroxy-4-(2-hydroxyphenyl)-5-(methylamino)-3-phenylpentanoic acid                            | —                                         | 1.077 | 0.003 |
| 195.0651 | neg | 4.600 | M-H                  | C <sub>10</sub> H <sub>12</sub> O <sub>4</sub>  | Homoveratric acid                                                                                   | Methoxybenzenes                           | 1.058 | 0.042 |

|          |     |       |                                        |                                                                |                                                                                                           |                                           |       |       |
|----------|-----|-------|----------------------------------------|----------------------------------------------------------------|-----------------------------------------------------------------------------------------------------------|-------------------------------------------|-------|-------|
| 351.0683 | neg | 4.546 | M+Na-2H                                | C <sub>14</sub> H <sub>18</sub> O <sub>9</sub>                 | 6-(5-ethyl-2,3-dihydroxyphenoxy)-3,4,5-trihydroxyoxane-2-carboxylic acid                                  | Carbohydrates and carbohydrate conjugates | 1.110 | 0.044 |
| 363.1649 | neg | 4.170 | M-H <sub>2</sub> O-H                   | C <sub>16</sub> H <sub>30</sub> O <sub>10</sub>                | 1,2,10-Trihydroxydihydro-trans-linalyl oxide 7-O-beta-D-glucopyranoside                                   | Carbohydrates and carbohydrate conjugates | 1.032 | 0.030 |
| 463.0865 | neg | 4.048 | M-H                                    | C <sub>21</sub> H <sub>20</sub> O <sub>12</sub>                | 3,4,5-trihydroxy-6-{4-[3-oxo-3-(2,3,4,6-tetrahydroxyphenyl)prop-1-en-1-yl]phenoxy}oxane-2-carboxylic acid | Flavonoid glycosides                      | 0.804 | 0.009 |
| 239.055  | neg | 3.761 | M+FA-H                                 | C <sub>10</sub> H <sub>10</sub> O <sub>4</sub>                 | 3-(4-methoxyphenyl)oxirane-2-carboxylic acid                                                              | Anisoles                                  | 0.930 | 0.001 |
| 206.0448 | neg | 3.707 | M-H <sub>2</sub> O-H                   | C <sub>10</sub> H <sub>11</sub> NO <sub>5</sub>                | 2-{[hydroxy(2-hydroxy-4-methoxyphenyl)methylidene]amino}acetic acid                                       | Benzoic acids and derivatives             | 1.032 | 0.015 |
| 255.0502 | neg | 2.984 | M-H                                    | C <sub>11</sub> H <sub>12</sub> O <sub>7</sub>                 | PISCIDIC ACID                                                                                             | —                                         | 0.892 | 0.002 |
| 295.1385 | neg | 2.964 | 2M-H                                   | C <sub>6</sub> H <sub>12</sub> O <sub>4</sub>                  | Glycerol 1-propanoate                                                                                     | Monoradylglycerols                        | 1.065 | 0.016 |
| 347.1447 | neg | 2.848 | M+Cl                                   | C <sub>20</sub> H <sub>24</sub> O <sub>3</sub>                 | 2-hydroxyethinylestradiol                                                                                 | Estrane steroids                          | 0.962 | 0.020 |
| 267.0726 | neg | 2.717 | M-H                                    | C <sub>10</sub> H <sub>12</sub> N <sub>4</sub> O <sub>5</sub>  | Inosine                                                                                                   | —                                         | 1.099 | 0.008 |
| 524.1107 | neg | 2.628 | M+Cl                                   | C <sub>24</sub> H <sub>27</sub> NO <sub>8</sub> S              | 4-Hydroxy duloxetine glucuronide                                                                          | Carbohydrates and carbohydrate conjugates | 0.951 | 0.031 |
| 151.0248 | neg | 2.085 | M-H                                    | C <sub>5</sub> H <sub>4</sub> N <sub>4</sub> O <sub>2</sub>    | Xanthine                                                                                                  | Purines and purine derivatives            | 1.081 | 0.009 |
| 235.0386 | neg | 1.166 | M-H <sub>2</sub> O-H                   | C <sub>7</sub> H <sub>14</sub> N <sub>2</sub> O <sub>6</sub> S | 5-L-Glutamyl-aurine                                                                                       | Amino acids, peptides, and analogues      | 1.090 | 0.036 |
| 226.9953 | neg | 1.022 | M+Cl                                   | C <sub>6</sub> H <sub>8</sub> O <sub>7</sub>                   | D-Glucaro-1,4-lactone                                                                                     | Gamma butyrolactones                      | 0.701 | 0.016 |
| 413.2677 | pos | 6.525 | M+Na, M+K, 2M+NH <sub>4</sub> , 2M+Na, | C <sub>24</sub> H <sub>38</sub> O <sub>4</sub>                 | Pregnan-20-one, 17-(acetyloxy)-3-hydroxy-6-methyl-, (3b,5b,6a)-                                           | -                                         | 1.095 | 0.002 |

|          |     |       |                                                                                                                             |                                                                                                                   |                                      |       |       |
|----------|-----|-------|-----------------------------------------------------------------------------------------------------------------------------|-------------------------------------------------------------------------------------------------------------------|--------------------------------------|-------|-------|
| 174.1132 | pos | 5.011 | M+ACN+Na,<br>M+H<br>M+H, 2M+H, C <sub>8</sub> H <sub>15</sub> NO <sub>3</sub><br>M+2Na-H,<br>M+Na, M+H-<br>H <sub>2</sub> O | Hexanoylglycine                                                                                                   | Amino acids, peptides, and analogues | 1.032 | 0.039 |
| 426.323  | pos | 6.504 | M+NH <sub>4</sub> ,<br>M+Na,<br>2M+NH <sub>4</sub> ,<br>2M+H,<br>2M+Na                                                      | C <sub>24</sub> H <sub>40</sub> O <sub>5</sub><br>3a,7a,12b-Trihydroxy-5b-cholanoic acid                          | -                                    | 1.132 | 0.008 |
| 463.1253 | pos | 6.148 | M+H, M+Na, C <sub>22</sub> H <sub>22</sub> O <sub>11</sub><br>M+NH <sub>4</sub> ,<br>M+H-H <sub>2</sub> O                   | 3,4,5-trihydroxy-6-[4-(7-hydroxy-8-methoxy-4-oxo-3,4-dihydro-2H-1-benzopyran-2-yl)phenoxy]oxane-2-carboxylic acid | Flavonoid glycosides                 | 1.450 | 0.000 |
| 355.2643 | pos | 6.441 | M+H-2H <sub>2</sub> O,<br>M+NH <sub>4</sub> ,<br>M+ACN+Na,<br>M+H-H <sub>2</sub> O                                          | C <sub>24</sub> H <sub>38</sub> O <sub>4</sub><br>12-Ketodeoxycholic acid                                         | Bile acids, alcohols and derivatives | 1.074 | 0.018 |
| 371.259  | pos | 6.385 | 2M+NH <sub>4</sub> ,<br>2M+Na,<br>M+NH <sub>4</sub> ,<br>M+H-2H <sub>2</sub> O                                              | C <sub>24</sub> H <sub>38</sub> O <sub>5</sub><br>3,7-Dihydroxy-12-oxocholanoic acid                              | Bile acids, alcohols and derivatives | 1.099 | 0.009 |
| 152.0574 | pos | 1.173 | M+H, M+Na, C <sub>5</sub> H <sub>5</sub> N <sub>5</sub> O<br>M+K                                                            | Guanine                                                                                                           | Purines and purine derivatives       | 1.066 | 0.036 |



|          |     |       |                                                 |                                                               |                                                                                       |                                          |       |       |
|----------|-----|-------|-------------------------------------------------|---------------------------------------------------------------|---------------------------------------------------------------------------------------|------------------------------------------|-------|-------|
| 146.093  | pos | 1.160 | M+H-H <sub>2</sub> O,<br>M+K, M+H               | C <sub>5</sub> H <sub>11</sub> N <sub>3</sub> O <sub>2</sub>  | 4-Guanidinobutanoic acid                                                              | Amino acids, peptides, and<br>analogues  | 0.968 | 0.025 |
| 303.1198 | pos | 2.831 | M+H, M+Na                                       | C <sub>12</sub> H <sub>18</sub> N <sub>2</sub> O <sub>7</sub> | Bicozamycin                                                                           | -                                        | 1.079 | 0.034 |
| 288.1927 | pos | 3.270 | M+H-2H <sub>2</sub> O,<br>M+H                   | C <sub>18</sub> H <sub>29</sub> NO <sub>4</sub>               | N-Jasmonoylisoleucine                                                                 | Amino acids, peptides, and<br>analogues  | 1.110 | 0.021 |
| 265.1191 | pos | 3.374 | M+H, M+K                                        | C <sub>13</sub> H <sub>16</sub> N <sub>2</sub> O <sub>4</sub> | AFMK                                                                                  | Carbonyl compounds                       | 0.869 | 0.016 |
| 377.147  | pos | 3.903 | M+H, M+Na                                       | C <sub>17</sub> H <sub>20</sub> N <sub>4</sub> O <sub>6</sub> | Riboflavin (Vitamin B2)                                                               | -                                        | 0.950 | 0.001 |
| 299.0928 | pos | 4.858 | M+H-H <sub>2</sub> O,<br>M+ACN+H                | C <sub>17</sub> H <sub>16</sub> O <sub>6</sub>                | 6-hydroxy-2-(4-hydroxyphenyl)-7,8-<br>dimethoxy-3,4-dihydro-2H-1-benzopyran-<br>4-one | O-methylated flavonoids                  | 1.195 | 0.000 |
| 243.0886 | pos | 5.374 | M+H, M+Na                                       | C <sub>12</sub> H <sub>10</sub> N <sub>4</sub> O <sub>2</sub> | Lumichrome                                                                            | -                                        | 1.055 | 0.001 |
| 197.0817 | pos | 5.430 | M+CH <sub>3</sub> OH+H,<br>2M+NH <sub>4</sub>   | C <sub>9</sub> H <sub>8</sub> O <sub>3</sub>                  | 4-methoxy-1-benzofuran-6-ol                                                           | —                                        | 0.942 | 0.033 |
| 482.3622 | pos | 7.037 | M+H, M+Na                                       | C <sub>24</sub> H <sub>52</sub> NO <sub>6</sub> P             | PC(O-16:0/0:0)                                                                        | -                                        | 1.062 | 0.010 |
| 336.1812 | pos | 6.183 | M+H-H <sub>2</sub> O,<br>M+CH <sub>3</sub> OH+H | C <sub>11</sub> H <sub>21</sub> N <sub>5</sub> O <sub>5</sub> | Glutamylarginine                                                                      | Amino acids, peptides, and<br>analogues  | 0.917 | 0.009 |
| 151.076  | pos | 6.037 | M+H-H <sub>2</sub> O,<br>M+ACN+Na               | C <sub>9</sub> H <sub>12</sub> O <sub>3</sub>                 | 1-Ipomeanol                                                                           | —                                        | 0.943 | 0.013 |
| 197.1293 | pos | 5.095 | M+H-2H <sub>2</sub> O,<br>M+NH <sub>4</sub>     | C <sub>10</sub> H <sub>20</sub> N <sub>2</sub> O <sub>4</sub> | Threoninyl-Leucine                                                                    | Amino acids, peptides, and<br>analogues  | 0.936 | 0.034 |
| 185.0817 | pos | 3.576 | M+H-H <sub>2</sub> O,<br>M+CH <sub>3</sub> OH+H | C <sub>8</sub> H <sub>8</sub> O <sub>3</sub>                  | Methyl furfuracrylate                                                                 | Fatty acid esters                        | 0.910 | 0.015 |
| 251.1399 | pos | 3.555 | M+H, M+NH <sub>4</sub>                          | C <sub>13</sub> H <sub>15</sub> NO <sub>3</sub>               | 3-(4-hydroxyphenyl)-N-(4-oxobutyl)prop-<br>2-enimidic acid                            | Hydroxycinnamic acids and<br>derivatives | 0.896 | 0.006 |
| 165.0554 | pos | 3.082 | M+H-H <sub>2</sub> O,<br>M+H                    | C <sub>9</sub> H <sub>10</sub> O <sub>4</sub>                 | 3-Hydroxy-4-methoxyphenylacetic acid                                                  | Methoxyphenols                           | 0.945 | 0.008 |

|          |     |       |                                |                                                                |                                                                            |                                              |       |       |
|----------|-----|-------|--------------------------------|----------------------------------------------------------------|----------------------------------------------------------------------------|----------------------------------------------|-------|-------|
| 136.0624 | pos | 1.166 | M+H,<br>2M+NH <sub>4</sub>     | C <sub>5</sub> H <sub>5</sub> N <sub>5</sub>                   | Adenine                                                                    | Purines and purine derivatives               | 1.071 | 0.022 |
| 137.0464 | pos | 1.730 | M+H, 2M+H                      | C <sub>5</sub> H <sub>4</sub> N <sub>4</sub> O                 | Hypoxanthine                                                               | Purines and purine derivatives               | 1.085 | 0.018 |
| 255.1349 | pos | 1.898 | M+NH <sub>4</sub> ,<br>M+ACN+H | C <sub>10</sub> H <sub>15</sub> NO <sub>4</sub>                | 2-(2,6-dihydroxy-3,4-<br>dimethoxycyclohexylidene)acetonitrile             | Alcohols and polyols                         | 0.944 | 0.008 |
| 240.11   | pos | 2.393 | M+H, M+Na                      | C <sub>9</sub> H <sub>13</sub> N <sub>5</sub> O <sub>3</sub>   | 7,8-dihydro-L-Biopterin                                                    | Pterins and derivatives                      | 0.944 | 0.004 |
| 317.0881 | pos | 3.026 | M+H-2H <sub>2</sub> O,<br>M+H  | C <sub>13</sub> H <sub>16</sub> O <sub>9</sub>                 | 3,4,5-trihydroxy-6-(2-hydroxy-6-<br>methoxyphenoxy)oxane-2-carboxylic acid | Carbohydrates and<br>carbohydrate conjugates | 1.375 | 0.000 |
| 133.0978 | pos | 0.714 | M+H                            | C <sub>5</sub> H <sub>12</sub> N <sub>2</sub> O <sub>2</sub>   | D-Ornithine                                                                | Amino acids, peptides, and<br>analogues      | 1.062 | 0.009 |
| 144.0484 | pos | 0.993 | M+H                            | C <sub>6</sub> H <sub>9</sub> NOS                              | 4-Methyl-5-thiazoleethanol                                                 | Thiazoles                                    | 0.952 | 0.016 |
| 167.0935 | pos | 1.139 | M+H                            | C <sub>7</sub> H <sub>10</sub> N <sub>4</sub> O                | N-Formyl-4-amino-5-aminomethyl-2-<br>methylpyrimidine                      | -                                            | 0.939 | 0.023 |
| 278.0658 | pos | 2.400 | M+NH <sub>4</sub>              | C <sub>6</sub> H <sub>13</sub> O <sub>9</sub> P                | Dolichyl phosphate D-mannose                                               | Polyprenols                                  | 0.800 | 0.003 |
| 298.1152 | pos | 2.476 | M+H                            | C <sub>11</sub> H <sub>15</sub> N <sub>5</sub> O <sub>5</sub>  | 7-Methylguanosine                                                          | —                                            | 0.843 | 0.001 |
| 442.0996 | pos | 2.741 | 2M+ACN+H                       | C <sub>8</sub> H <sub>8</sub> O <sub>6</sub>                   | 2,4,5-trihydroxy-3-methoxybenzoic acid                                     | Quinone and hydroquinone<br>lipids           | 1.076 | 0.011 |
| 232.1191 | pos | 2.755 | M+H                            | C <sub>10</sub> H <sub>17</sub> NO <sub>5</sub>                | Isovalerylglutamic acid                                                    | Amino acids, peptides, and<br>analogues      | 1.085 | 0.002 |
| 335.1117 | pos | 2.963 | M+H-2H <sub>2</sub> O          | C <sub>17</sub> H <sub>22</sub> O <sub>9</sub>                 | 4-Hydroxy-5-(phenyl)-valeric acid-O-<br>glucuronide                        | Carbohydrates and<br>carbohydrate conjugates | 1.062 | 0.022 |
| 195.1501 | pos | 3.005 | M+H-2H <sub>2</sub> O          | C <sub>11</sub> H <sub>22</sub> N <sub>2</sub> O <sub>3</sub>  | Isoleucyl-Valine                                                           | Amino acids, peptides, and<br>analogues      | 1.157 | 0.044 |
| 472.1594 | pos | 3.040 | M+H                            | C <sub>20</sub> H <sub>21</sub> N <sub>7</sub> O <sub>7</sub>  | 10-Formyldihydrofolate                                                     | Phosphosphingolipids                         | 0.946 | 0.040 |
| 179.0493 | pos | 3.151 | M+H                            | C <sub>5</sub> H <sub>10</sub> N <sub>2</sub> O <sub>3</sub> S | L-Cys-Gly                                                                  | Amino acids, peptides, and<br>analogues      | 0.921 | 0.030 |

|          |     |       |                       |                                                               |                                                                                            |                                           |       |       |
|----------|-----|-------|-----------------------|---------------------------------------------------------------|--------------------------------------------------------------------------------------------|-------------------------------------------|-------|-------|
| 313.1404 | pos | 3.339 | M+H                   | C <sub>19</sub> H <sub>20</sub> O <sub>4</sub>                | M-(beta-Acetyl-alpha-ethyl-p-hydroxyphenethyl)benzoic acid                                 | -                                         | 0.949 | 0.007 |
| 278.1146 | pos | 3.611 | M+H-H <sub>2</sub> O  | C <sub>13</sub> H <sub>17</sub> N <sub>3</sub> O <sub>5</sub> | Asparaginy-Tyrosine                                                                        | Amino acids, peptides, and analogues      | 1.063 | 0.011 |
| 195.0773 | pos | 3.917 | M+H                   | C <sub>9</sub> H <sub>10</sub> N <sub>2</sub> O <sub>3</sub>  | 2-Pyridylacetyl glycine                                                                    | -                                         | 0.934 | 0.003 |
| 410.1821 | pos | 4.683 | M+ACN+H               | C <sub>18</sub> H <sub>24</sub> O <sub>8</sub>                | 3,4,5-trihydroxy-6- {[ (1E)-1-(4-methoxyphenyl)pent-1-en-3-yl]oxy} oxane-2-carboxylic acid | Carbohydrates and carbohydrate conjugates | 0.760 | 0.023 |
| 319.1664 | pos | 4.899 | M+K                   | C <sub>17</sub> H <sub>28</sub> O <sub>3</sub>                | 12S-HHT                                                                                    | Fatty acids and conjugates                | 1.104 | 0.011 |
| 558.2721 | pos | 5.018 | 2M+ACN+H              | C <sub>11</sub> H <sub>18</sub> N <sub>2</sub> O <sub>5</sub> | Gamma-L-Glutamyl-L-pipecolic acid                                                          | Amino acids, peptides, and analogues      | 1.113 | 0.026 |
| 170.0608 | pos | 5.164 | M+H-2H <sub>2</sub> O | C <sub>11</sub> H <sub>11</sub> NO <sub>3</sub>               | Edulitine                                                                                  | Quinolones and derivatives                | 0.963 | 0.037 |
| 319.1277 | pos | 5.290 | M+NH <sub>4</sub>     | C <sub>11</sub> H <sub>15</sub> N <sub>3</sub> O <sub>7</sub> | Gamma-Glutamyl-beta-(isoxazolin-5-on-2-yl)alanine                                          | Amino acids, peptides, and analogues      | 0.921 | 0.044 |
| 176.1078 | pos | 5.534 | M+H                   | C <sub>11</sub> H <sub>13</sub> NO                            | N-Acetyltranlylcypromine                                                                   | -                                         | 0.864 | 0.020 |
| 287.0926 | pos | 5.890 | M+H                   | C <sub>16</sub> H <sub>14</sub> O <sub>5</sub>                | Sakuranetin                                                                                | O-methylated flavonoids                   | 1.057 | 0.005 |
| 210.1127 | pos | 6.002 | M+ACN+H               | C <sub>9</sub> H <sub>12</sub> O <sub>3</sub>                 | 4-Ipomeanol                                                                                | Carbonyl compounds                        | 0.948 | 0.002 |
| 467.3141 | pos | 6.392 | M+H-H <sub>2</sub> O  | C <sub>30</sub> H <sub>44</sub> O <sub>5</sub>                | Ganolucidic acid E                                                                         | Triterpenoids                             | 1.105 | 0.027 |
| 389.2696 | pos | 6.399 | M+H                   | C <sub>24</sub> H <sub>36</sub> O <sub>4</sub>                | 1alpha-hydroxy-25,26,27-trinorvitamin D3 24-carboxylic acid                                | -                                         | 1.127 | 0.029 |
| 151.1124 | pos | 6.406 | M+H                   | C <sub>10</sub> H <sub>14</sub> O                             | Carvone                                                                                    | Monoterpenoids                            | 0.911 | 0.000 |
| 285.0768 | pos | 6.406 | M+H                   | C <sub>16</sub> H <sub>12</sub> O <sub>5</sub>                | Genkwanin                                                                                  | -                                         | 1.274 | 0.000 |
| 437.2665 | pos | 6.659 | M+H                   | C <sub>21</sub> H <sub>41</sub> O <sub>7</sub> P              | 1-Oleoyl Lysophosphatidic Acid (sodium salt)                                               | -                                         | 1.145 | 0.043 |
| 540.2988 | pos | 6.750 | M+H-2H <sub>2</sub> O | C <sub>32</sub> H <sub>41</sub> N <sub>5</sub> O <sub>5</sub> | Mauritine A                                                                                | Amino acids, peptides, and analogues      | 1.231 | 0.001 |

|          |     |       |                       |                                                              |                                                                                                                  |                                          |       |       |
|----------|-----|-------|-----------------------|--------------------------------------------------------------|------------------------------------------------------------------------------------------------------------------|------------------------------------------|-------|-------|
| 500.2615 | pos | 6.638 | M+ACN+H               | C <sub>26</sub> H <sub>34</sub> O <sub>7</sub>               | 6-hydroxy-5-{[(3-hydroxy-2-oxo-2H-chromen-7-yl)oxy]methyl}-1,1,4a,6-tetramethyl-decahydronaphthalen-2-yl acetate | Hydroxycoumarins                         | 1.142 | 0.023 |
| 330.3378 | pos | 6.455 | M+H                   | C <sub>20</sub> H <sub>43</sub> NO <sub>2</sub>              | N,N-dimethyl-Safingol                                                                                            | -                                        | 1.038 | 0.036 |
| 213.1647 | pos | 6.441 | M+H-2H <sub>2</sub> O | C <sub>16</sub> H <sub>24</sub> O <sub>2</sub>               | 2-Phenylethyl octanoate                                                                                          | Fatty acid esters                        | 1.143 | 0.003 |
| 423.2756 | pos | 6.413 | M+H                   | C <sub>24</sub> H <sub>38</sub> O <sub>6</sub>               | 3alpha,7beta,12alpha-Trihydroxy-6-oxo-5alpha-cholan-24-oic Acid                                                  | -                                        | 1.134 | 0.039 |
| 405.2646 | pos | 6.406 | M+H                   | C <sub>24</sub> H <sub>36</sub> O <sub>5</sub>               | 7a,12a-Dihydroxy-3-oxo-4-cholenoic acid                                                                          | Bile acids, alcohols and derivatives     | 1.124 | 0.023 |
| 302.3064 | pos | 6.392 | M+H                   | C <sub>18</sub> H <sub>39</sub> NO <sub>2</sub>              | Sphinganine                                                                                                      | Amines                                   | 1.057 | 0.002 |
| 218.1548 | pos | 6.197 | M+H                   | C <sub>14</sub> H <sub>19</sub> NO                           | ETHOXYQUIN                                                                                                       | Quinolones and derivatives               | 0.836 | 0.012 |
| 385.1851 | pos | 5.981 | M+H-H <sub>2</sub> O  | C <sub>19</sub> H <sub>30</sub> O <sub>9</sub>               | D-Linalool 3-(6"-malonylglucoside)                                                                               | Fatty acyl glycosides                    | 1.051 | 0.014 |
| 299.0929 | pos | 5.437 | M+H-H <sub>2</sub> O  | C <sub>17</sub> H <sub>16</sub> O <sub>6</sub>               | 5,7-dihydroxy-6-methoxy-2-(4-methoxyphenyl)-3,4-dihydro-2H-1-benzopyran-4-one                                    | O-methylated flavonoids                  | 1.100 | 0.042 |
| 371.169  | pos | 5.297 | M+Na                  | C <sub>16</sub> H <sub>28</sub> O <sub>8</sub>               | Nepetariaside                                                                                                    | Terpene glycosides                       | 1.042 | 0.028 |
| 172.0765 | pos | 5.109 | M+H-H <sub>2</sub> O  | C <sub>11</sub> H <sub>11</sub> NO <sub>2</sub>              | Indole-3-propionic acid                                                                                          | Indolyl carboxylic acids and derivatives | 0.966 | 0.035 |
| 134.0971 | pos | 5.088 | M+H                   | C <sub>9</sub> H <sub>11</sub> N                             | 2-Methylindoline                                                                                                 | -                                        | 0.937 | 0.025 |
| 320.15   | pos | 5.032 | M+ACN+H               | C <sub>15</sub> H <sub>18</sub> O <sub>5</sub>               | 2beta,9xi-Dihydroxy-8-oxo-1(10),4,11(13)-germacatrien-12,6alpha-olide                                            | Terpene lactones                         | 0.903 | 0.011 |
| 356.1169 | pos | 4.718 | M+ACN+Na              | C <sub>9</sub> H <sub>16</sub> N <sub>4</sub> O <sub>7</sub> | Canavaninosuccinate                                                                                              | Amino acids, peptides, and analogues     | 0.870 | 0.025 |

|          |     |       |                         |                                                               |                                                                                 |                                           |       |       |
|----------|-----|-------|-------------------------|---------------------------------------------------------------|---------------------------------------------------------------------------------|-------------------------------------------|-------|-------|
| 372.2418 | pos | 4.342 | 2M+3H <sub>2</sub> O+2H | C <sub>15</sub> H <sub>30</sub> N <sub>6</sub> O <sub>4</sub> | Kinetensin 1-3                                                                  | Amino acids, peptides, and analogues      | 1.398 | 0.000 |
| 347.1689 | pos | 4.084 | M+ACN+H                 | C <sub>15</sub> H <sub>19</sub> N <sub>3</sub> O <sub>4</sub> | Threoninyl-Tryptophan                                                           | Amino acids, peptides, and analogues      | 1.099 | 0.008 |
| 191.1186 | pos | 4.070 | M+H                     | C <sub>11</sub> H <sub>14</sub> N <sub>2</sub> O              | CYTISINE                                                                        | -                                         | 0.829 | 0.016 |
| 192.1027 | pos | 4.070 | M+H                     | C <sub>11</sub> H <sub>13</sub> NO <sub>2</sub>               | 5-Methoxytryptophol                                                             | Indoles                                   | 0.835 | 0.005 |
| 197.1181 | pos | 4.049 | M+H                     | C <sub>11</sub> H <sub>16</sub> O <sub>3</sub>                | Benzenemethanol, 2-(2-hydroxypropoxy)-3-methyl-                                 | -                                         | 0.954 | 0.022 |
| 326.1974 | pos | 3.903 | M+NH <sub>4</sub>       | C <sub>17</sub> H <sub>24</sub> O <sub>5</sub>                | Dihydrocumambrin A                                                              | Terpene lactones                          | 1.069 | 0.021 |
| 269.1504 | pos | 3.840 | M+H                     | C <sub>13</sub> H <sub>20</sub> N <sub>2</sub> O <sub>4</sub> | Dihydroxymelphalan                                                              | -                                         | 0.942 | 0.008 |
| 208.0613 | pos | 3.701 | M+H                     | C <sub>10</sub> H <sub>9</sub> NO <sub>4</sub>                | 2-Formaminobenzoylacetate                                                       | -                                         | 1.029 | 0.004 |
| 182.0456 | pos | 3.666 | M+H                     | C <sub>8</sub> H <sub>7</sub> NO <sub>4</sub>                 | 2-Methyl-3-hydroxy-5-formylpyridine-4-carboxylate                               | Pyridinecarboxylic acids and derivatives  | 0.887 | 0.007 |
| 152.0713 | pos | 3.472 | M+H                     | C <sub>8</sub> H <sub>9</sub> NO <sub>2</sub>                 | P-Acetamidophenol (Acetaminophen, Tylenol)                                      | -                                         | 0.943 | 0.039 |
| 305.0778 | pos | 3.444 | M+ACN+H                 | C <sub>9</sub> H <sub>13</sub> NO <sub>6</sub> S              | N-acetyl-S-(3-oxo-3-carboxy-n-propyl)cysteine                                   | Amino acids, peptides, and analogues      | 0.877 | 0.022 |
| 127.0397 | pos | 3.430 | M+H                     | C <sub>6</sub> H <sub>6</sub> O <sub>3</sub>                  | 4-HYDROXY-6-METHYLPYRAN-2-ONE                                                   | -                                         | 1.032 | 0.021 |
| 374.1459 | pos | 3.409 | M+NH <sub>4</sub>       | C <sub>16</sub> H <sub>20</sub> O <sub>9</sub>                | 3,4,5-trihydroxy-6- {[3-(3-methoxyphenyl)propanoyl]oxy} oxane-2-carboxylic acid | Carbohydrates and carbohydrate conjugates | 0.903 | 0.034 |
| 192.0698 | pos | 3.409 | M+H                     | C <sub>7</sub> H <sub>13</sub> NO <sub>3</sub> S              | N-Acetyl-DL-methionine                                                          | -                                         | 0.963 | 0.015 |
| 315.156  | pos | 3.270 | M+H                     | C <sub>19</sub> H <sub>22</sub> O <sub>4</sub>                | Grandiflorone                                                                   | -                                         | 1.074 | 0.027 |
| 122.0278 | pos | 3.200 | M+H                     | C <sub>3</sub> H <sub>7</sub> NO <sub>2</sub> S               | L-Cysteine                                                                      | Amino acids, peptides, and analogues      | 0.928 | 0.010 |

|          |     |       |                       |                                                              |                                                                                     |                                      |       |       |
|----------|-----|-------|-----------------------|--------------------------------------------------------------|-------------------------------------------------------------------------------------|--------------------------------------|-------|-------|
| 145.1342 | pos | 3.054 | M+H                   | C <sub>7</sub> H <sub>16</sub> N <sub>2</sub> O              | N-Acetylcadaverine                                                                  | Carboxylic acid derivatives          | 0.931 | 0.010 |
| 297.1457 | pos | 2.866 | M+H-2H <sub>2</sub> O | C <sub>19</sub> H <sub>24</sub> O <sub>5</sub>               | 3-[6,8-dihydroxy-2-methyl-2-(4-methylpent-3-en-1-yl)-2H-chromen-5-yl]propanoic acid | 1-benzopyrans                        | 0.956 | 0.040 |
| 256.0822 | pos | 2.783 | M+H                   | C <sub>11</sub> H <sub>13</sub> NO <sub>6</sub>              | Nicotinate D-ribonucleoside                                                         | -                                    | 0.956 | 0.008 |
| 238.0944 | pos | 2.490 | M+H                   | C <sub>9</sub> H <sub>11</sub> N <sub>5</sub> O <sub>3</sub> | Biopterin                                                                           | Pterins and derivatives              | 1.029 | 0.008 |
| 196.0838 | pos | 2.393 | M+H                   | C <sub>7</sub> H <sub>9</sub> N <sub>5</sub> O <sub>2</sub>  | 2-Amino-4-hydroxy-6-(hydroxymethyl)-7,8-dihydropteridine                            | -                                    | 0.924 | 0.004 |
| 200.1039 | pos | 2.190 | M+H                   | C <sub>8</sub> H <sub>13</sub> N <sub>3</sub> O <sub>3</sub> | Gamma-Glutamyl-beta-aminopropiononitrile                                            | Amino acids, peptides, and analogues | 0.967 | 0.031 |
| 278.0659 | pos | 2.114 | M+K                   | C <sub>9</sub> H <sub>13</sub> N <sub>5</sub> O <sub>3</sub> | O2'-4a-cyclic-tetrahydrobiopterin                                                   | Sesquiterpenoids                     | 0.887 | 0.042 |
| 188.0559 | pos | 1.988 | M+H                   | C <sub>7</sub> H <sub>9</sub> NO <sub>5</sub>                | 1-(Malonylamino)cyclopropanecarboxylic acid                                         | Amino acids, peptides, and analogues | 0.912 | 0.001 |
| 204.1239 | pos | 1.173 | M+H                   | C <sub>9</sub> H <sub>17</sub> NO <sub>4</sub>               | Acetylcarnitine                                                                     | Fatty acid esters                    | 1.095 | 0.004 |
| 122.0719 | pos | 0.979 | M+H-H <sub>2</sub> O  | C <sub>6</sub> H <sub>9</sub> N <sub>3</sub> O               | Histidinal                                                                          | Amines                               | 0.909 | 0.020 |
| 519.331  | pos | 6.743 | M+Na                  | C <sub>24</sub> H <sub>51</sub> NO <sub>7</sub> P+           | 1-palmitoylglycerophosphocholine                                                    | Glycerophosphocholines               | 0.947 | 0.002 |
| 148.0611 | pos | 1.229 | M+H                   | C <sub>5</sub> H <sub>9</sub> NO <sub>4</sub>                | L-Glutamate                                                                         | Amino acids, peptides, and analogues | 1.053 | 0.010 |

**Supplementary Table S3** Identification of the most discriminant metabolomic variables between PC group and IR group

| m/z      | Mode | Retention time | Adducts            | Formula                                                         | Metabolite                                                                                           | Subclass                                  |     | Fold change (PC/Control) | P value |
|----------|------|----------------|--------------------|-----------------------------------------------------------------|------------------------------------------------------------------------------------------------------|-------------------------------------------|-----|--------------------------|---------|
| 227.0663 | neg  | 2.628          | M-H, M+FA-H, M+Cl  | C <sub>9</sub> H <sub>12</sub> N <sub>2</sub> O <sub>5</sub>    | 2'-Deoxyuridine                                                                                      | Pyrimidine deoxyribonucleosides           | 2'- | 1.141                    | 0.011   |
| 296.6158 | neg  | 6.172          | M-2H, M-H, M+Na-2H | C <sub>26</sub> H <sub>45</sub> NO <sub>10</sub> S <sub>2</sub> | Taurocholic acid 3-sulfate                                                                           | Bile acids, alcohols and derivatives      |     | 0.928                    | 0.050   |
| 461.1074 | neg  | 6.152          | M-H, 2M-H, M+Na-2H | C <sub>22</sub> H <sub>22</sub> O <sub>11</sub>                 | 6-{3,5-dihydroxy-4-[3-(4-methoxyphenyl)prop-2-enoyl]phenoxy}-3,4,5-trihydroxyoxane-2-carboxylic acid | Flavonoid glycosides                      |     | 1.246                    | 0.000   |
| 357.0815 | neg  | 2.957          | M-H, M+Na-2H, 2M-H | C <sub>15</sub> H <sub>18</sub> O <sub>10</sub>                 | 6-{[3-(2,4-dihydroxyphenyl)propanoyl]oxy}-3,4,5-trihydroxyoxane-2-carboxylic acid                    | Carbohydrates and carbohydrate conjugates |     | 0.982                    | 0.049   |
| 265.1436 | neg  | 6.439          | M-H, M+Na-2H       | C <sub>13</sub> H <sub>24</sub> O <sub>4</sub>                  | 1,11-Undecanedicarboxylic acid                                                                       | Fatty acids and conjugates                |     | 1.019                    | 0.038   |
| 472.1567 | neg  | 2.971          | M-H                | C <sub>20</sub> H <sub>23</sub> N <sub>7</sub> O <sub>7</sub>   | Folinic acid                                                                                         | Pterins and derivatives                   |     | 0.903                    | 0.006   |
| 345.063  | neg  | 4.798          | M-H                | C <sub>14</sub> H <sub>18</sub> O <sub>8</sub> S                | 3-hydroxy-3-[4-hydroxy-3-(3-methylbut-2-en-1-yl)phenyl]-2-(sulfooxy)propanoic acid                   | —                                         |     | 1.357                    | 0.000   |
| 306.1184 | neg  | 5.645          | M+FA-H             | C <sub>11</sub> H <sub>19</sub> NO <sub>6</sub>                 | Epidermin                                                                                            | Carbohydrates and carbohydrate conjugates | and | 1.378                    | 0.029   |
| 331.0846 | neg  | 5.994          | M+FA-H             | C <sub>13</sub> H <sub>18</sub> O <sub>5</sub> S                | {[1-(4-methoxyphenyl)-4-methylpent-1-en-3-yl]oxy}sulfonic acid                                       | Anisoles                                  |     | 1.123                    | 0.044   |

|          |     |       |        |                                                   |                                                            |                                           |       |       |
|----------|-----|-------|--------|---------------------------------------------------|------------------------------------------------------------|-------------------------------------------|-------|-------|
| 231.0322 | neg | 6.138 | M-H    | C <sub>9</sub> H <sub>12</sub> O <sub>5</sub> S   | (4-ethyl-2-methoxyphenyl)oxidanesulfonic acid              | Arylsulfates                              | 1.182 | 0.002 |
| 271.1906 | neg | 6.542 | M+FA-H | C <sub>14</sub> H <sub>26</sub> O <sub>2</sub>    | Myristoleic acid                                           | Fatty acids and conjugates                | 1.040 | 0.029 |
| 478.2921 | neg | 6.789 | M-H    | C <sub>23</sub> H <sub>46</sub> NO <sub>7</sub> P | PE(18:1(9Z)/0:0)                                           | -                                         | 0.830 | 0.013 |
| 271.227  | neg | 6.878 | M-H    | C <sub>16</sub> H <sub>32</sub> O <sub>3</sub>    | 2-hydroxyhexadecanoic acid                                 | Fatty acids and conjugates                | 1.073 | 0.019 |
| 299.2581 | neg | 7.002 | M-H    | C <sub>18</sub> H <sub>36</sub> O <sub>3</sub>    | DL-2-hydroxy stearic acid                                  | -                                         | 1.072 | 0.005 |
| 327.2893 | neg | 7.139 | M-H    | C <sub>20</sub> H <sub>40</sub> O <sub>3</sub>    | 12-hydroxyicosanoic acid                                   | Fatty acids and conjugates                | 1.181 | 0.002 |
| 355.3206 | neg | 7.291 | M-H    | C <sub>22</sub> H <sub>44</sub> O <sub>3</sub>    | 2(R)-hydroxydocosanoic acid                                | Fatty acids and conjugates                | 1.209 | 0.031 |
| 436.2817 | neg | 6.844 | M-H    | C <sub>21</sub> H <sub>44</sub> NO <sub>6</sub> P | PE(P-16:0e/0:0)                                            | -                                         | 1.066 | 0.034 |
| 452.2767 | neg | 6.782 | M-H    | C <sub>21</sub> H <sub>44</sub> NO <sub>7</sub> P | PE(16:0/0:0)                                               | Glycerophosphoethanolamines               | 0.831 | 0.007 |
| 283.0603 | neg | 6.412 | M-H    | C <sub>16</sub> H <sub>12</sub> O <sub>5</sub>    | Acacetin                                                   | O-methylated flavonoids                   | 1.287 | 0.001 |
| 309.1333 | neg | 6.240 | M+FA-H | C <sub>15</sub> H <sub>20</sub> O <sub>4</sub>    | Tavulin                                                    | Terpene lactones                          | 0.891 | 0.018 |
| 379.2112 | neg | 6.172 | M+FA-H | C <sub>20</sub> H <sub>30</sub> O <sub>4</sub>    | Prostaglandin B2                                           | Eicosanoids                               | 0.948 | 0.039 |
| 359.0763 | neg | 6.104 | M+FA-H | C <sub>17</sub> H <sub>14</sub> O <sub>6</sub>    | 2-(3,5-dimethoxyphenyl)-5,7-dihydroxy-4H-chromen-4-one     | O-methylated flavonoids                   | 0.811 | 0.003 |
| 263.1279 | neg | 5.816 | M-H    | C <sub>15</sub> H <sub>20</sub> O <sub>4</sub>    | (+/-)Absciscic Acid                                        | -                                         | 0.931 | 0.040 |
| 383.1268 | neg | 5.563 | M+K-2H | C <sub>20</sub> H <sub>26</sub> O <sub>5</sub>    | 19-Noraldosterone                                          | Hydroxysteroids                           | 0.943 | 0.029 |
| 403.1595 | neg | 5.193 | 2M-H   | C <sub>9</sub> H <sub>14</sub> O <sub>5</sub>     | 3-(1-Hydroxymethyl-1-propenyl)pentanedioic acid            | Fatty acids and conjugates                | 1.030 | 0.023 |
| 303.0531 | neg | 4.825 | M+FA-H | C <sub>11</sub> H <sub>14</sub> O <sub>5</sub> S  | (3-methyl-2-oxo-4-phenylbutoxy)sulfonic acid               | Phenylpropanes                            | 1.099 | 0.018 |
| 217.107  | neg | 4.627 | M+FA-H | C <sub>9</sub> H <sub>16</sub> O <sub>3</sub>     | Cis-3-Hexenyl lactate                                      | Carboxylic acid derivatives               | 1.024 | 0.030 |
| 317.0324 | neg | 3.366 | M+FA-H | C <sub>11</sub> H <sub>12</sub> O <sub>6</sub> S  | [(5-hydroxy-2-methyl-2H-chromen-2-yl)methoxy]sulfonic acid | 1-benzopyrans                             | 1.155 | 0.025 |
| 361.1129 | neg | 3.142 | M+FA-H | C <sub>14</sub> H <sub>20</sub> O <sub>8</sub>    | Vanilloloside                                              | Carbohydrates and carbohydrate conjugates | 0.959 | 0.013 |



|          |     |       |                                                     |                                                               |                                                                                                                   |                                           |       |       |
|----------|-----|-------|-----------------------------------------------------|---------------------------------------------------------------|-------------------------------------------------------------------------------------------------------------------|-------------------------------------------|-------|-------|
| 225.087  | neg | 2.882 | M-H                                                 | C <sub>10</sub> H <sub>14</sub> N <sub>2</sub> O <sub>4</sub> | Porphobilinogen                                                                                                   | Amines                                    | 0.980 | 0.014 |
| 155.0084 | neg | 1.139 | M-H                                                 | C <sub>5</sub> H <sub>4</sub> N <sub>2</sub> O <sub>4</sub>   | Orotic acid                                                                                                       | Pyrimidines and pyrimidine derivatives    | 0.960 | 0.019 |
| 463.1253 | pos | 6.148 | M+H, M+Na, M+NH <sub>4</sub> , M+H-H <sub>2</sub> O | C <sub>22</sub> H <sub>22</sub> O <sub>11</sub>               | 3,4,5-trihydroxy-6-[4-(7-hydroxy-8-methoxy-4-oxo-3,4-dihydro-2H-1-benzopyran-2-yl)phenoxy]oxane-2-carboxylic acid | Flavonoid glycosides                      | 1.331 | 0.000 |
| 239.0923 | pos | 3.680 | M+H, M+ACN+Na                                       | C <sub>12</sub> H <sub>14</sub> O <sub>5</sub>                | 3,4,5-Trimethoxycinnamic acid                                                                                     | Hydroxycinnamic acids and derivatives     | 1.022 | 0.049 |
| 299.0928 | pos | 4.858 | M+H-H <sub>2</sub> O, M+ACN+H                       | C <sub>17</sub> H <sub>16</sub> O <sub>6</sub>                | 6-hydroxy-2-(4-hydroxyphenyl)-7,8-dimethoxy-3,4-dihydro-2H-1-benzopyran-4-one                                     | O-methylated flavonoids                   | 1.248 | 0.000 |
| 482.3622 | pos | 7.037 | M+H, M+Na                                           | C <sub>24</sub> H <sub>52</sub> NO <sub>6</sub> P             | PC(O-16:0/0:0)                                                                                                    | -                                         | 1.046 | 0.026 |
| 136.0624 | pos | 1.166 | M+H, 2M+NH <sub>4</sub>                             | C <sub>5</sub> H <sub>5</sub> N <sub>5</sub>                  | Adenine                                                                                                           | Purines and purine derivatives            | 1.054 | 0.037 |
| 317.0881 | pos | 3.026 | M+H-2H <sub>2</sub> O, M+H                          | C <sub>13</sub> H <sub>16</sub> O <sub>9</sub>                | 3,4,5-trihydroxy-6-(2-hydroxy-6-methoxyphenoxy)oxane-2-carboxylic acid                                            | Carbohydrates and carbohydrate conjugates | 1.421 | 0.000 |
| 144.0484 | pos | 0.993 | M+H                                                 | C <sub>6</sub> H <sub>9</sub> NOS                             | 4-Methyl-5-thiazoleethanol                                                                                        | Thiazoles                                 | 0.958 | 0.013 |
| 132.0774 | pos | 1.007 | M+H                                                 | C <sub>4</sub> H <sub>9</sub> N <sub>3</sub> O <sub>2</sub>   | Creatine                                                                                                          | Amino acids, peptides, and analogues      | 1.065 | 0.013 |
| 140.0348 | pos | 2.678 | M+H-2H <sub>2</sub> O                               | C <sub>6</sub> H <sub>9</sub> NO <sub>5</sub>                 | N-Formyl-L-glutamic acid                                                                                          | Amino acids, peptides, and analogues      | 0.970 | 0.027 |
| 137.0967 | pos | 4.543 | M+H                                                 | C <sub>9</sub> H <sub>12</sub> O                              | P-Isopropylphenol                                                                                                 | Cumenes                                   | 1.029 | 0.010 |
| 165.0918 | pos | 4.550 | M+H                                                 | C <sub>10</sub> H <sub>12</sub> O <sub>2</sub>                | THYMOQUINONE                                                                                                      | Carbonyl compounds                        | 1.035 | 0.009 |
| 201.113  | pos | 4.620 | M+H                                                 | C <sub>10</sub> H <sub>16</sub> O <sub>4</sub>                | Decenedioic acid                                                                                                  | Fatty acids and conjugates                | 1.026 | 0.034 |

|          |     |       |                         |                                                               |                                                                                                                    |                                      |       |       |
|----------|-----|-------|-------------------------|---------------------------------------------------------------|--------------------------------------------------------------------------------------------------------------------|--------------------------------------|-------|-------|
| 176.1078 | pos | 5.534 | M+H                     | C <sub>11</sub> H <sub>13</sub> NO                            | N-Acetyltranylcypromine                                                                                            | -                                    | 0.929 | 0.036 |
| 370.1671 | pos | 6.093 | M+NH <sub>4</sub>       | C <sub>21</sub> H <sub>20</sub> O <sub>5</sub>                | Artonol A                                                                                                          | 1-benzopyrans                        | 0.834 | 0.000 |
| 300.218  | pos | 6.100 | M+H-H <sub>2</sub> O    | C <sub>16</sub> H <sub>31</sub> NO <sub>5</sub>               | 3-hydroxynonanoyl carnitine                                                                                        | Fatty acid esters                    | 0.962 | 0.018 |
| 285.0768 | pos | 6.406 | M+H                     | C <sub>16</sub> H <sub>12</sub> O <sub>5</sub>                | Genkwanin                                                                                                          | -                                    | 1.220 | 0.002 |
| 119.0863 | pos | 6.455 | M+H                     | C <sub>9</sub> H <sub>10</sub>                                | Alpha-Methylstyrene                                                                                                | Phenylpropenes                       | 0.977 | 0.028 |
| 500.2615 | pos | 6.638 | M+ACN+H                 | C <sub>26</sub> H <sub>34</sub> O <sub>7</sub>                | 6-hydroxy-5- {[ (3-hydroxy-2-oxo-2H-chromen-7-yl)oxy]methyl}-1,1,4a,6-tetramethyl-decahydronaphthalen-2-yl acetate | Hydroxycoumarins                     | 0.928 | 0.035 |
| 497.2738 | pos | 6.518 | M+CH <sub>3</sub> OH+H  | C <sub>25</sub> H <sub>36</sub> O <sub>8</sub>                | Testosterone glucuronide                                                                                           | Steroidal glycosides                 | 1.229 | 0.009 |
| 460.2711 | pos | 6.462 | M+NH <sub>4</sub>       | C <sub>26</sub> H <sub>34</sub> O <sub>6</sub>                | 3-O-Acetylepisamarcandin                                                                                           | —                                    | 0.975 | 0.015 |
| 474.2869 | pos | 6.455 | M+NH <sub>4</sub>       | C <sub>27</sub> H <sub>36</sub> O <sub>6</sub>                | Lucidenolactone                                                                                                    | Triterpenoids                        | 0.961 | 0.036 |
| 135.0811 | pos | 6.455 | M+H                     | C <sub>9</sub> H <sub>10</sub> O                              | 2,5-Dimethylbenzaldehyde                                                                                           | Benzoyl derivatives                  | 0.978 | 0.045 |
| 398.2916 | pos | 6.197 | M+H                     | C <sub>22</sub> H <sub>39</sub> NO <sub>5</sub>               | AMP-Deoxynojirimycin                                                                                               | -                                    | 0.963 | 0.025 |
| 414.1569 | pos | 6.128 | M+ACN+H                 | C <sub>20</sub> H <sub>20</sub> O <sub>7</sub>                | 6-(2,4-dihydroxyphenyl)-2-(2,6-dihydroxyphenyl)-5-hydroxy-4-methylcyclohex-3-ene-1-carboxylic acid                 | Benzenediols                         | 0.851 | 0.001 |
| 99.04497 | pos | 5.639 | M+H                     | C <sub>5</sub> H <sub>6</sub> O <sub>2</sub>                  | 2-Furanmethanol                                                                                                    | —                                    | 1.053 | 0.048 |
| 299.0929 | pos | 5.437 | M+H-H <sub>2</sub> O    | C <sub>17</sub> H <sub>16</sub> O <sub>6</sub>                | 5,7-dihydroxy-6-methoxy-2-(4-methoxyphenyl)-3,4-dihydro-2H-1-benzopyran-4-one                                      | O-methylated flavonoids              | 0.912 | 0.018 |
| 139.076  | pos | 5.018 | M+H                     | C <sub>8</sub> H <sub>10</sub> O <sub>2</sub>                 | 2-(4-Hydroxyphenyl)ethanol                                                                                         | Tyrosols and derivatives             | 1.023 | 0.018 |
| 372.2418 | pos | 4.342 | 2M+3H <sub>2</sub> O+2H | C <sub>15</sub> H <sub>30</sub> N <sub>6</sub> O <sub>4</sub> | Kinetensin 1-3                                                                                                     | Amino acids, peptides, and analogues | 1.151 | 0.002 |

|          |     |       |                      |                                                               |                                                  |                                        |       |       |
|----------|-----|-------|----------------------|---------------------------------------------------------------|--------------------------------------------------|----------------------------------------|-------|-------|
| 305.0778 | pos | 3.444 | M+ACN+H              | C <sub>9</sub> H <sub>13</sub> NO <sub>6</sub> S              | N-acetyl-S-(3-oxo-3-carboxy-n-propyl)cysteine    | Amino acids, peptides, and analogues   | 0.917 | 0.036 |
| 276.0699 | pos | 3.082 | M+H                  | C <sub>10</sub> H <sub>13</sub> NO <sub>8</sub>               | 3-beta-D-Glucopyranuronosyloxy-5-methylisoxazole | -                                      | 0.704 | 0.013 |
| 456.2106 | pos | 2.790 | M+H-H <sub>2</sub> O | C <sub>25</sub> H <sub>27</sub> N <sub>7</sub> O <sub>3</sub> | CD 1790                                          | Purines and purine derivatives         | 0.966 | 0.002 |
| 113.0354 | pos | 2.629 | M+H                  | C <sub>4</sub> H <sub>4</sub> N <sub>2</sub> O <sub>2</sub>   | Uracil                                           | Pyrimidines and pyrimidine derivatives | 1.115 | 0.007 |
| 248.1502 | pos | 2.197 | M+H                  | C <sub>11</sub> H <sub>21</sub> NO <sub>5</sub>               | (R)-3-hydroxybutyrylcarnitine                    | Fatty acid esters                      | 0.968 | 0.040 |
| 188.0559 | pos | 1.988 | M+H                  | C <sub>7</sub> H <sub>9</sub> NO <sub>5</sub>                 | 1-(Malonylamino)cyclopropanecarboxylic acid      | Amino acids, peptides, and analogues   | 0.947 | 0.002 |
| 365.1445 | pos | 1.647 | M+ACN+Na             | C <sub>17</sub> H <sub>19</sub> NO <sub>4</sub>               | Oxymorphone                                      | —                                      | 0.978 | 0.015 |
| 112.0878 | pos | 0.701 | M+H                  | C <sub>5</sub> H <sub>9</sub> N <sub>3</sub>                  | Histamine                                        | Amines                                 | 0.966 | 0.004 |
| 93.0376  | pos | 0.603 | M+H                  | C <sub>3</sub> H <sub>8</sub> OS                              | 2-(Methylthio)ethanol                            | Dialkylthioethers                      | 0.980 | 0.005 |
| 115.0873 | pos | 0.979 | M+H-H <sub>2</sub> O | C <sub>5</sub> H <sub>12</sub> N <sub>2</sub> O <sub>2</sub>  | Ornithine                                        | Amino acids, peptides, and analogues   | 0.983 | 0.001 |

---
